# Supplementary material for: Preparative separation of 1,1-diphenyl-2-picrylhydrazyl inhibitors originating from Saxifraga sinomontana employing medium-pressure liquid chromatography in combination with reversed-phase liquid chromatography
Source: PubMed Central journal article supplement — RSC Adv. 2021 Dec 2;11(61):38739–49. doi: 10.1039/d1ra05819c (PMC9044138; doi:10.1039/d1ra05819c), 2021-12-02
Supplement: RA-011-D1RA05819C-s001.pdf [file RA-011-D1RA05819C-s001.pdf]

### Supporting Information

#### Preparative separation of 1,1-diphenyl-2-picrylhydrazyl inhibitors originating from *Saxifraga sinomontana* employing medium-pressure liquid chromatography in combination with reversed-phase liquid chromatography

Jun Dang<sup>a</sup>, Jinbin Ma<sup>c</sup>, Yangzom Dawa<sup>c</sup>, Chuang Liu<sup>a</sup>, Tengfei Ji<sup>b\*</sup>, Qilan Wang<sup>a\*1</sup>

<sup>a</sup> Qinghai Provincial Key Laboratory of Tibetan Medicine Research, Key Laboratory of Tibetan Medicine Research, Northwest Institute of Plateau Biology, Chinese Academy of Sciences, Xining, Qinghai, China

<sup>b</sup> State Key Laboratory of Bioactive Substance and Function of Natural Medicines, Institute of Materia Medica, Chinese Academy of Medical Sciences and Peking Union Medical College, Beijing 100050, China

<sup>c</sup> Qinghai Provincial Key Laboratory of Tibet Plateau Biodiversity Formation Mechanism and Comprehensive Utilization, College of Life Sciences, Qinghai Normal University, Xining 810008, China

---

**Correspondence:** Qinghai Provincial Key Laboratory of Tibetan Medicine Research, Key Laboratory of Tibetan Medicine Research, Northwest Institute of Plateau Biology, Chinese Academy of Sciences, Xining, Qinghai, China

**E-mail:** jitf@imm.ac.cn (Tengfei Ji), wql@nwipb.cas.cn (Qilan Wang)

## Table of Contents

|                                                                                                                                                                                    |    |
|------------------------------------------------------------------------------------------------------------------------------------------------------------------------------------|----|
| Figure S1. ESI+ of Peak Fr3-1 fraction (3-methoxy-4-hydroxyphenol-(6'-O-galloyl)-1-O-β-D-glucopyranoside) .....                                                                    | 4  |
| Figure S2. ESI- of Peak Fr3-1 fraction (3-methoxy-4-hydroxyphenol-(6'-O-galloyl)-1-O-β-D-glucopyranoside) .....                                                                    | 5  |
| Figure S3. <sup>1</sup> H NMR Spectrum (600 MHz) of Peak Fr3-1 fraction (3-methoxy-4-hydroxyphenol-(6'-O-galloyl)-1-O-β-D-glucopyranoside) in MeOH- <i>d</i> <sub>4</sub> .....    | 6  |
| Figure S4. <sup>13</sup> C NMR Spectrum (151 MHz) of Peak Fr4-1-1 fraction (3-methoxy-4-hydroxyphenol-(6'-O-galloyl)-1-O-β-D-glucopyranoside) in MeOH- <i>d</i> <sub>4</sub> ..... | 7  |
| Figure S5. ESI+ of Peak Fr3-2 fraction (3,4,5-trimethoxyphenyl-(6'-O-galloyl)-1-O-β-D-glucopyranoside) .....                                                                       | 8  |
| Figure S6. ESI- of Peak Fr3-2 fraction (3,4,5-trimethoxyphenyl-(6'-O-galloyl)-1-O-β-D-glucopyranoside) .....                                                                       | 9  |
| Figure S7. <sup>1</sup> H NMR Spectrum (600 MHz) of Peak Fr3-2 fraction (3,4,5-trimethoxyphenyl-(6'-O-galloyl)-1-O-β-D-glucopyranoside) in MeOH- <i>d</i> <sub>4</sub> .....       | 10 |
| Figure S8. <sup>13</sup> C NMR Spectrum (151 MHz) of Peak Fr3-2 fraction (3,4,5-trimethoxyphenyl-(6'-O-galloyl)-1-O-β-D-glucopyranoside) in MeOH- <i>d</i> <sub>4</sub> .....      | 11 |
| Figure S9. HR-ESI-MS of Peak Fr4-1 fraction (saximonsin A) .....                                                                                                                   | 12 |
| Figure S10. <sup>1</sup> H NMR Spectrum (600 MHz) of Peak Fr4-1 fraction (saximonsin A) in MeOH- <i>d</i> <sub>4</sub> .....                                                       | 13 |
| Figure S11. <sup>13</sup> C NMR Spectrum (151 MHz) of Peak Fr4-1 fraction (saximonsin A) in MeOH- <i>d</i> <sub>4</sub> .....                                                      | 14 |
| Figure S12. DEPT Spectrum of Peak Fr4-1 fraction (saximonsin A) in MeOH- <i>d</i> <sub>4</sub> .....                                                                               | 15 |
| Figure S13. HSQC Spectrum of Peak Fr4-1 fraction (saximonsin A) in MeOH- <i>d</i> <sub>4</sub> .....                                                                               | 16 |
| Figure S14. HMBC Spectrum of Peak Fr4-1 fraction (saximonsin A) in MeOH- <i>d</i> <sub>4</sub> .....                                                                               | 17 |
| Figure S15. H-H COSY Spectrum of Peak Fr4-1 fraction (saximonsin A) in MeOH- <i>d</i> <sub>4</sub> .....                                                                           | 18 |
| Figure S16. NOESY Spectrum of Peak Fr4-1 fraction (saximonsin A) in MeOH- <i>d</i> <sub>4</sub> .....                                                                              | 19 |
| Figure S17. IR spectrum of Peak Fr4-1 fraction (saximonsin A) .....                                                                                                                | 20 |
| Figure S18. UV spectrum of Peak Fr4-1 fraction (saximonsin A) .....                                                                                                                | 21 |
| Figure S19. Optical rotation of Peak Fr4-1 fraction (saximonsin A) .....                                                                                                           | 22 |
| Figure S20. HR-ESI-MS of Peak Fr4-2 fraction (saximonsin B) .....                                                                                                                  | 23 |
| Figure S21. <sup>1</sup> H NMR Spectrum (600 MHz) of Peak Fr4-2 fraction (saximonsin B) in MeOH- <i>d</i> <sub>4</sub> .....                                                       | 24 |
| Figure S22. <sup>13</sup> C NMR Spectrum (151 MHz) of Peak Fr4-2 fraction (saximonsin B) in MeOH- <i>d</i> <sub>4</sub> .....                                                      | 25 |
| Figure S23. DEPT Spectrum of Peak Fr4-2 fraction (saximonsin B) in MeOH- <i>d</i> <sub>4</sub> .....                                                                               | 26 |
| Figure S24. HSQC Spectrum of Peak Fr4-2 fraction (saximonsin B) in MeOH- <i>d</i> <sub>4</sub> .....                                                                               | 27 |
| Figure S25. HMBC Spectrum of Peak Fr4-2 fraction (saximonsin B) in MeOH- <i>d</i> <sub>4</sub> .....                                                                               | 28 |
| Figure S26. H-H COSY Spectrum of Peak Fr4-2 fraction (saximonsin B) in MeOH- <i>d</i> <sub>4</sub> .....                                                                           | 29 |
| Figure S27. NOESY Spectrum of Peak Fr4-2 fraction (saximonsin B) in MeOH- <i>d</i> <sub>4</sub> .....                                                                              | 30 |
| Figure S28. IR spectrum of Peak Fr4-2 fraction (saximonsin B) .....                                                                                                                | 31 |
| Figure S29. UV spectrum of Peak Fr4-2 fraction (saximonsin B) .....                                                                                                                | 32 |

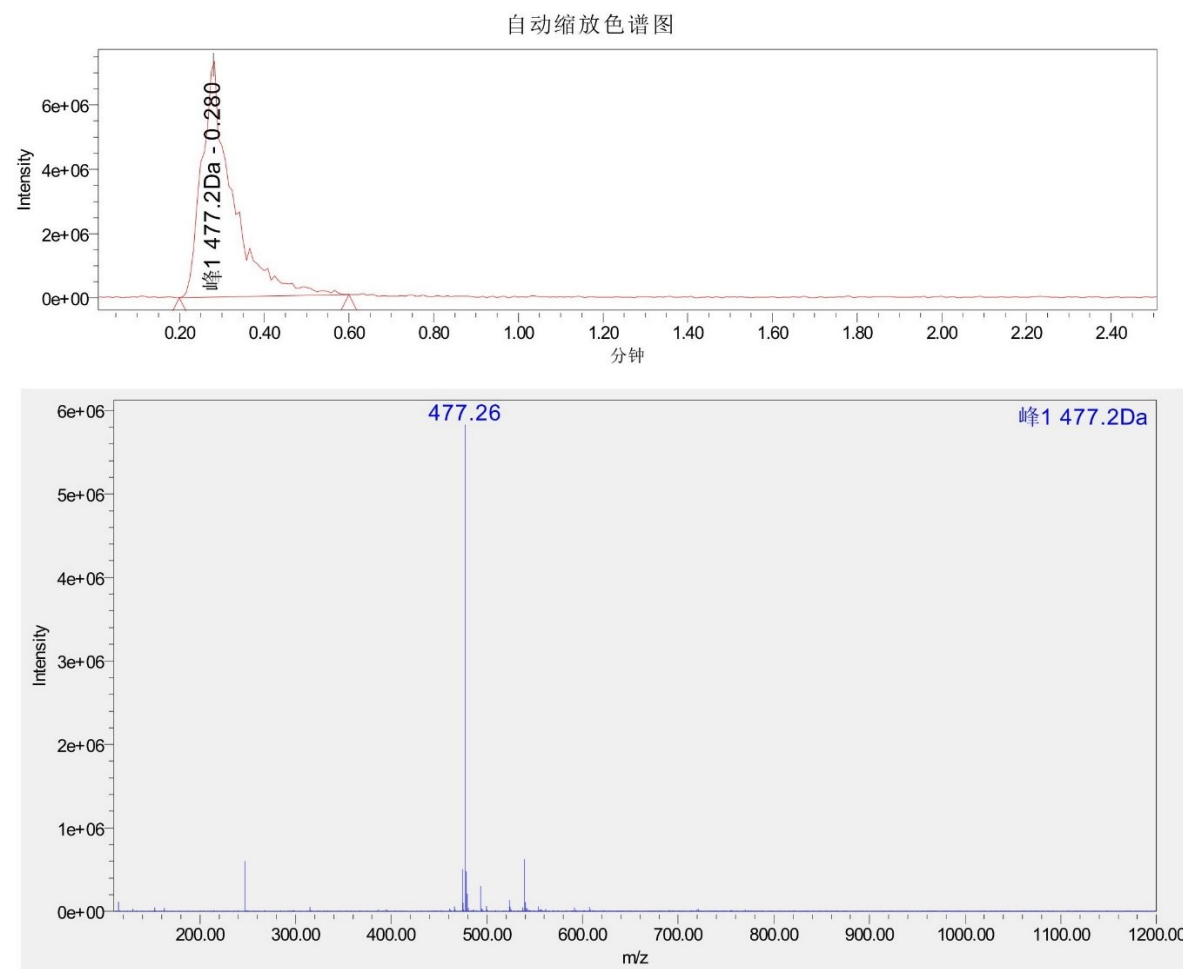

**Figure S1. ESI+ of Peak Fr3-1 fraction (3-methoxy-4-hydroxyphenol-(6'-O-galloyl)-1-O- $\beta$ -D-glucopyranoside)**

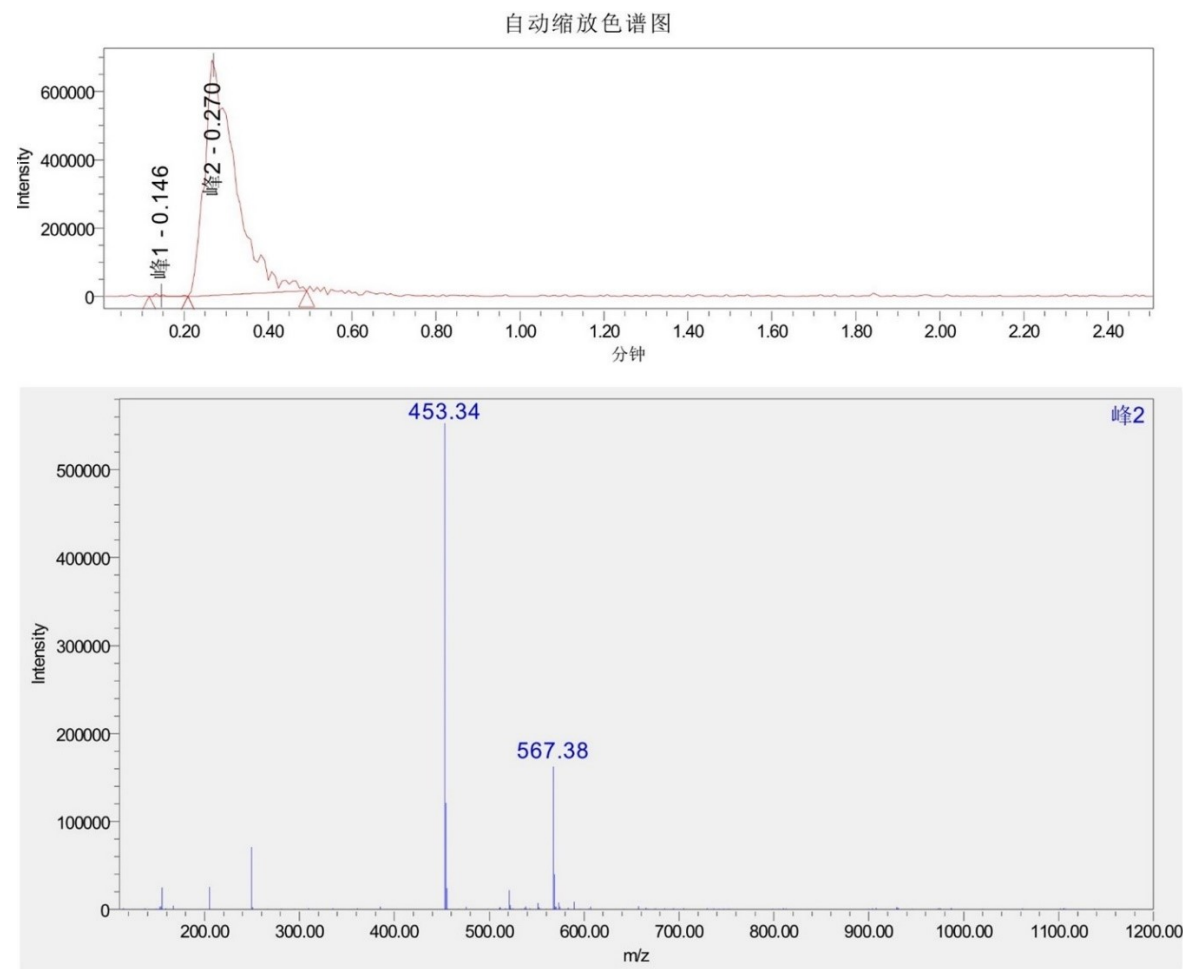

Figure S2. ESI- of Peak Fr3-1 fraction (3-methoxy-4-hydroxyphenol-(6'-O-galloyl)-1-O- $\beta$ -D-glucopyranoside)

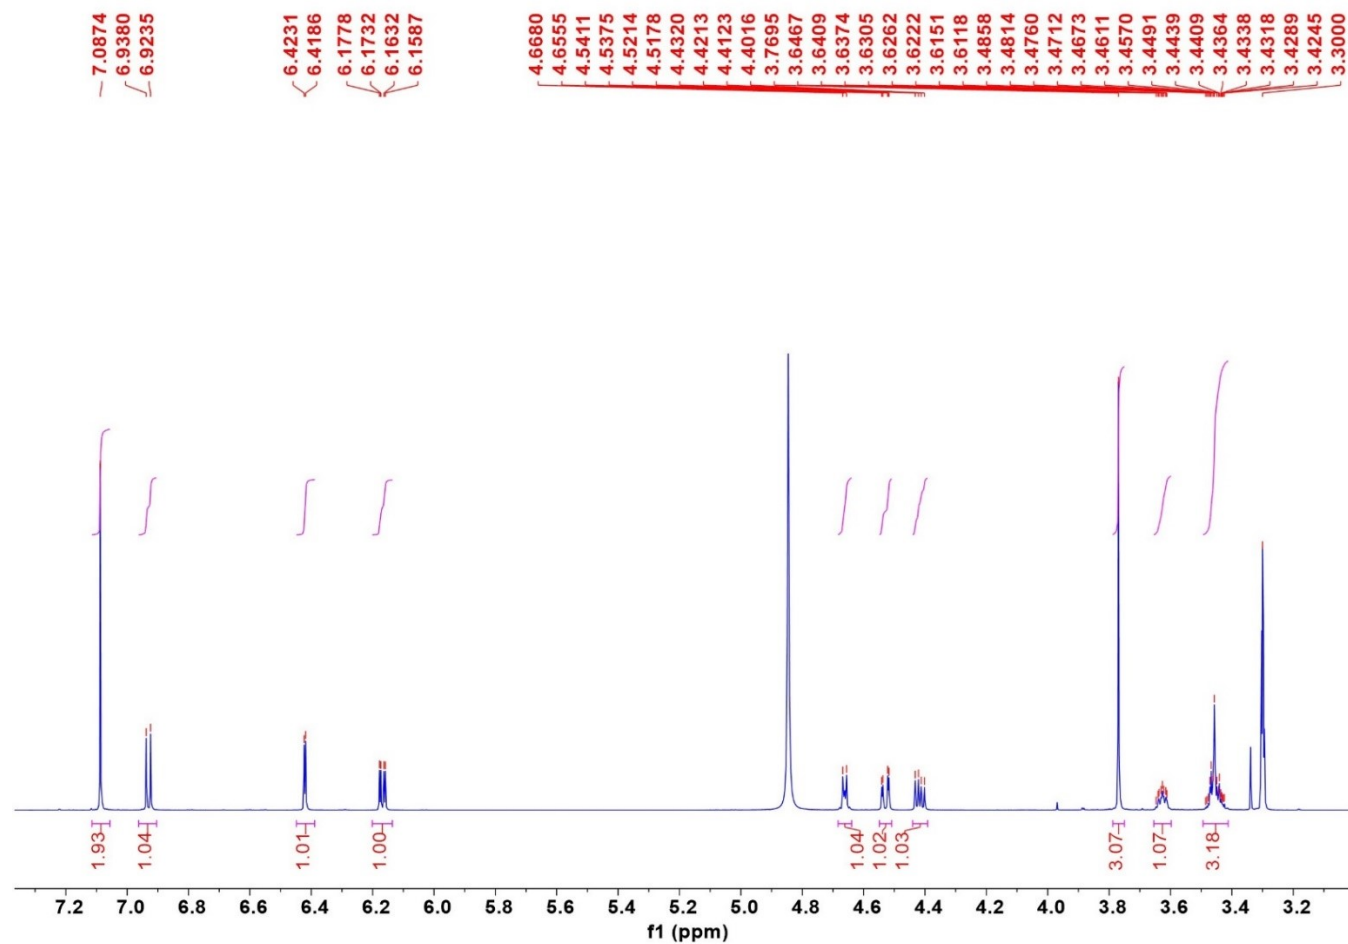

Figure S3. <sup>1</sup>H NMR Spectrum (600 MHz) of Peak Fr3-1 fraction (3-methoxy-4-hydroxyphenol-(6'-O-galloyl)-1-O-β-D-glucopyranoside) in MeOH-*d*<sub>4</sub>

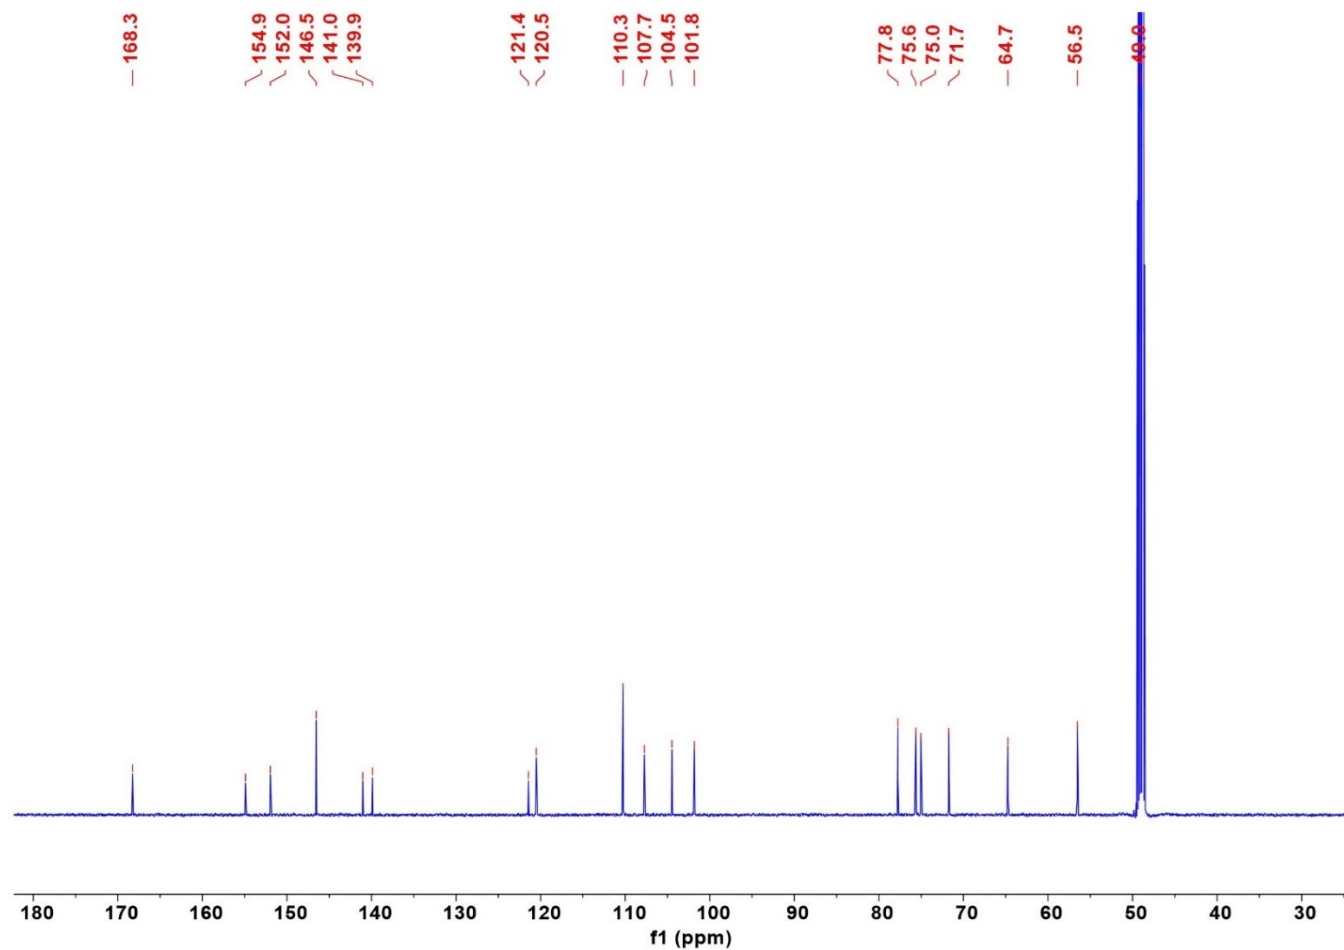

Figure S4.  $^{13}\text{C}$  NMR Spectrum (151 MHz) of Peak Fr4-1-1 fraction (3-methoxy-4-hydroxyphenol-(6'-O-galloyl)-1-O- $\beta$ -D-glucopyrano side) in  $\text{MeOH-}d_4$

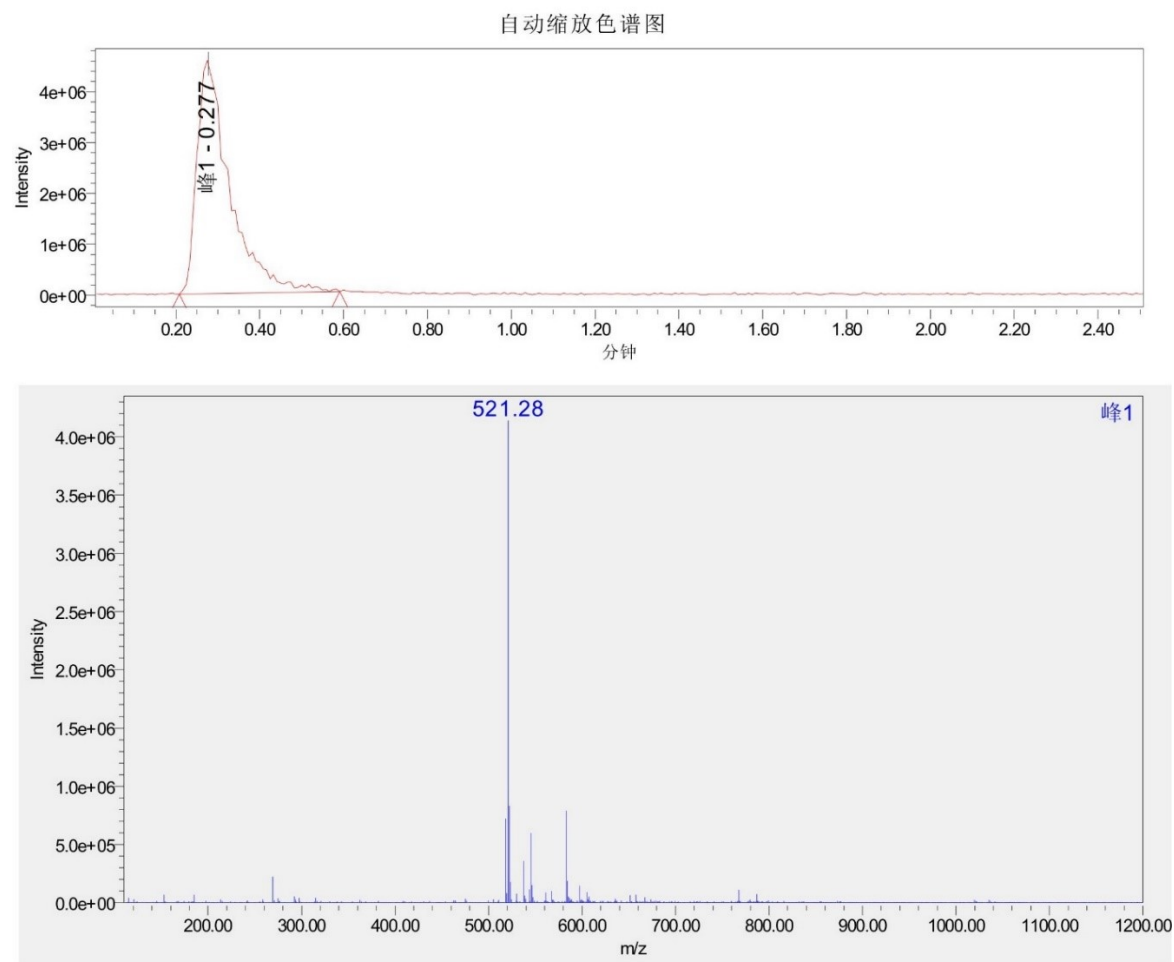

Figure S5. ESI+ of Peak Fr3-2 fraction (3,4,5-trimethoxyphenyl-(6'-O-galloyl)-1-O- $\beta$ -D-glucopyranoside)

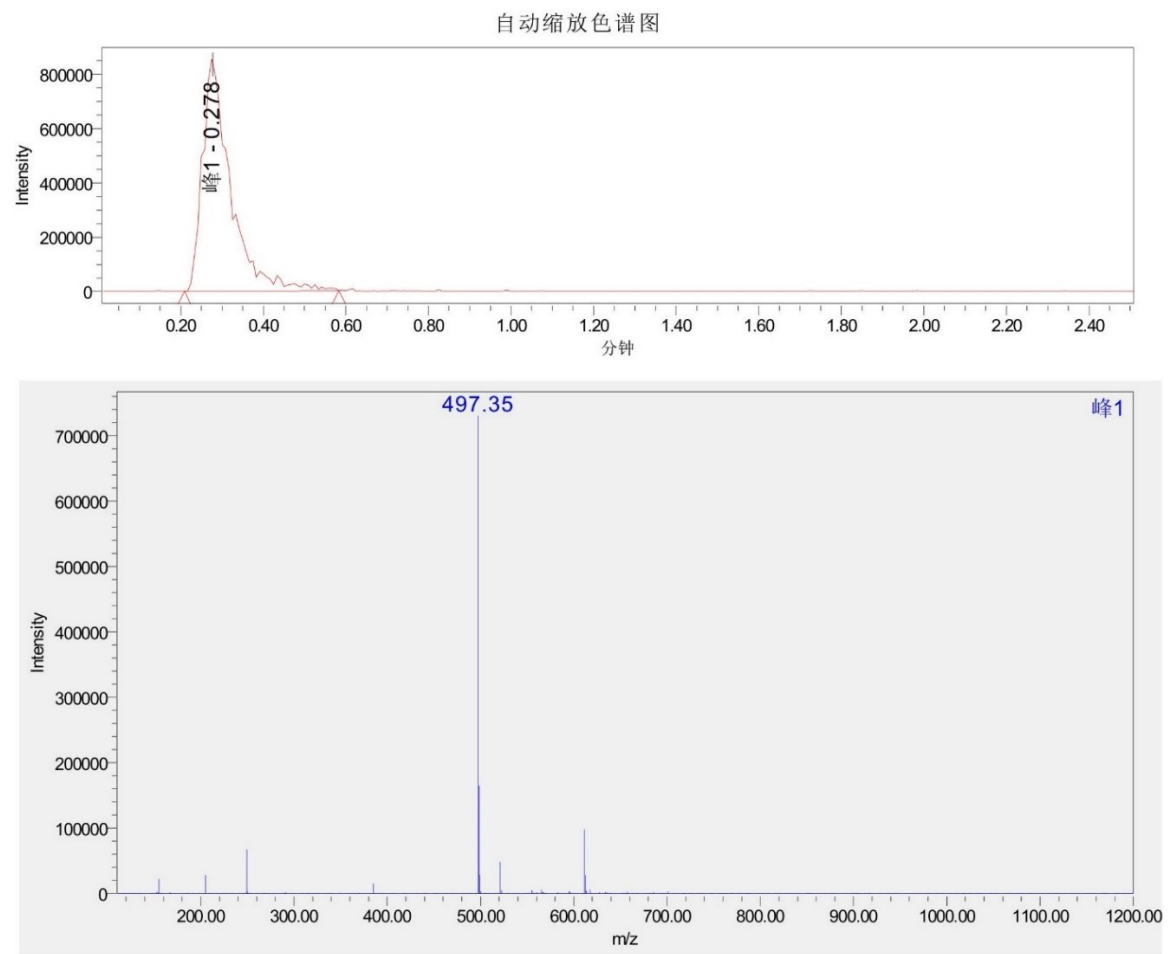

**Figure S6. ESI- of Peak Fr3-2 fraction (3,4,5-trimethoxyphenyl-(6'-O-galloyl)-1-O- $\beta$ -D-glucopyranoside)**



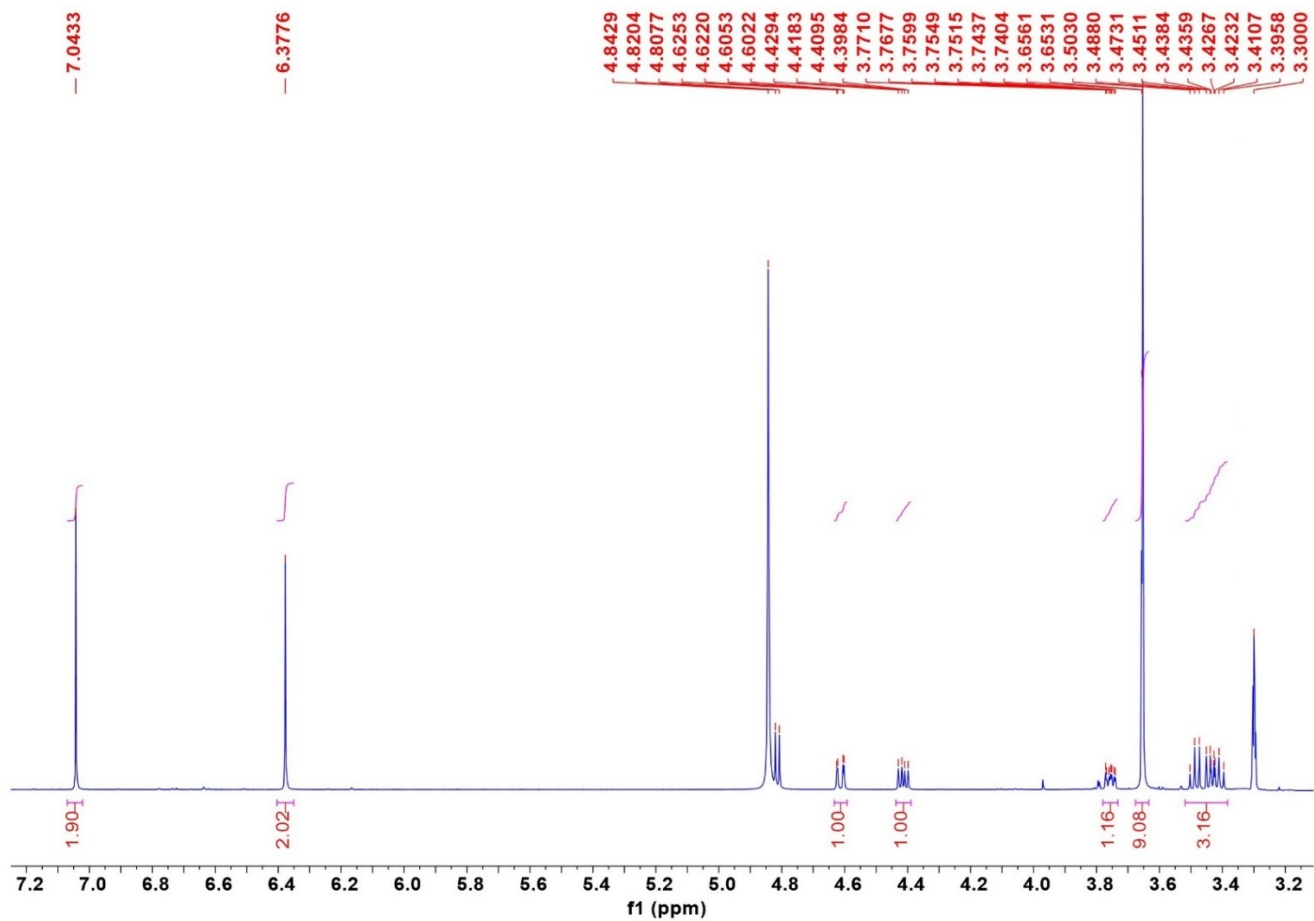

Figure S7. <sup>1</sup>H NMR Spectrum (600 MHz) of Peak Fr3-2 fraction (3,4,5-trimethoxyphenyl-(6'-O-galloyl)-1-O-β-D-glucopyranoside) in MeOH-*d*<sub>4</sub>

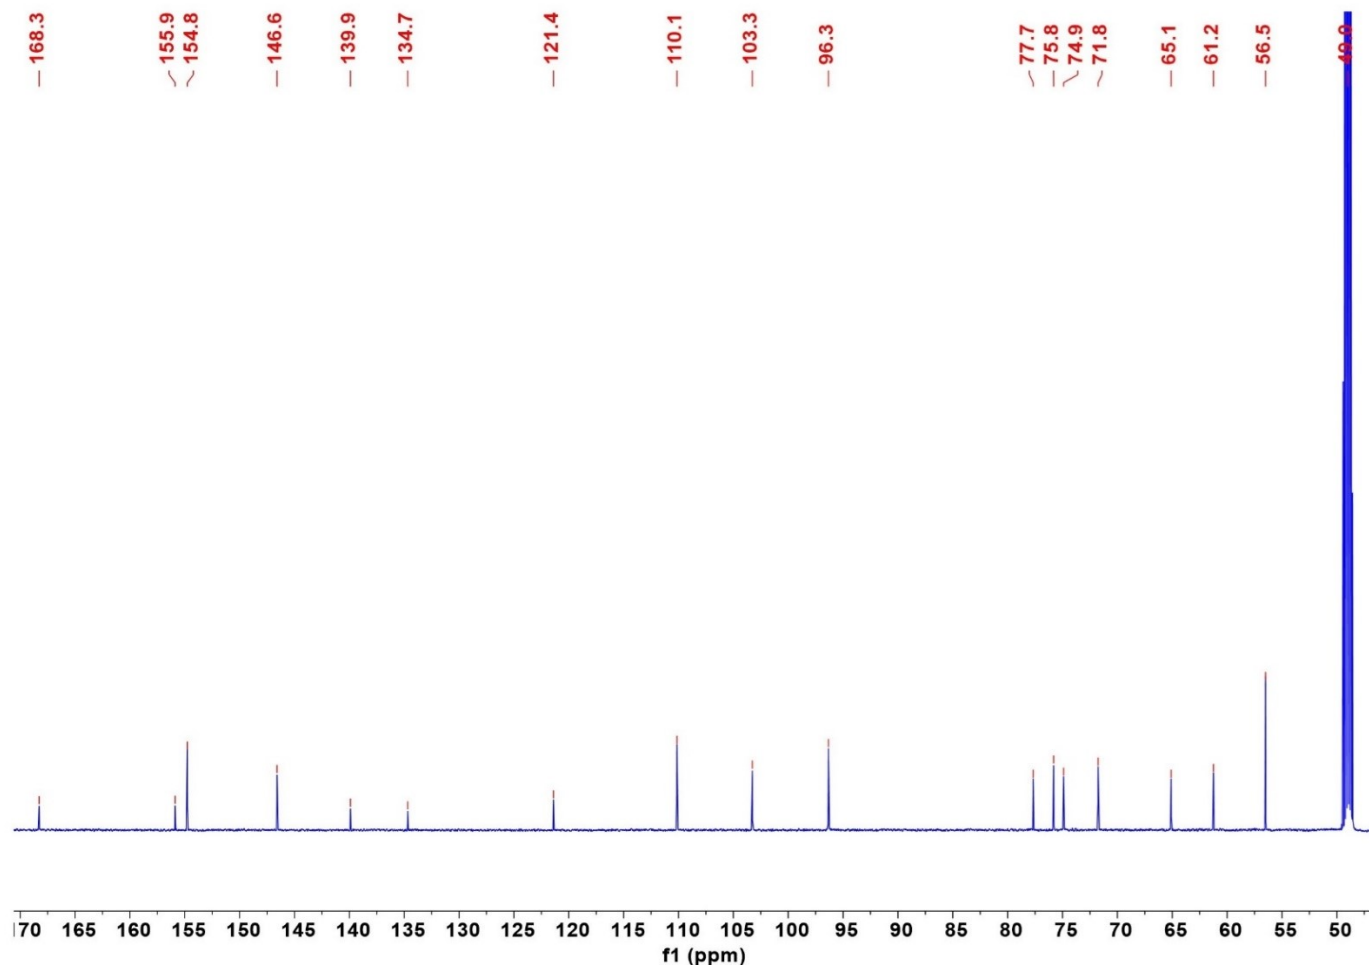

Figure S8.  $^{13}\text{C}$  NMR Spectrum (151 MHz) of Peak Fr3-2 fraction (3,4,5-trimethoxyphenyl-(6'-O-galloyl)-1-O- $\beta$ -D-glucopyranoside) in  $\text{MeOH-}d_4$

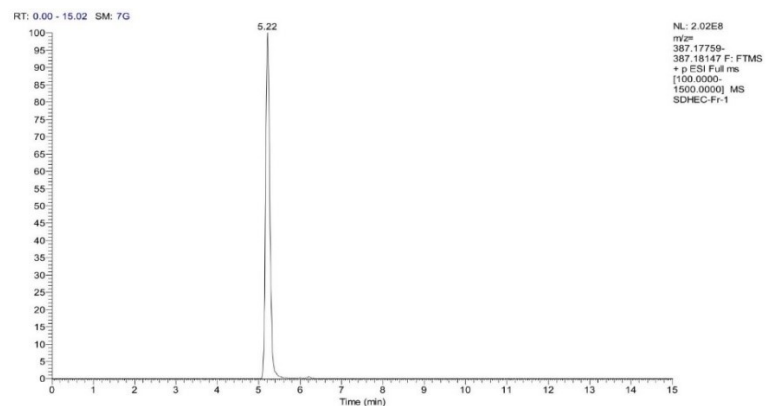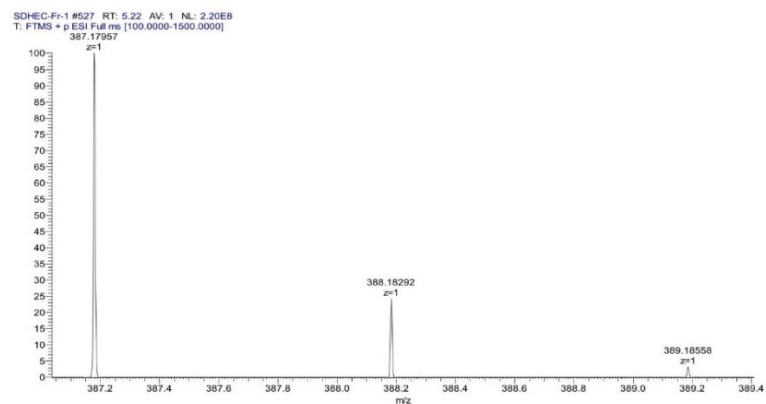

| m/z       | Theo. Mass | Delta (ppm) | RDB equiv. | Composition |     |
|-----------|------------|-------------|------------|-------------|-----|
| 387.17957 | 387.18022  | -1.67       | 9.5        | C22 H27 O6  | M+H |

Figure S9. HR-ESI-MS of Peak Fr4-1 fraction (saximonsin A)

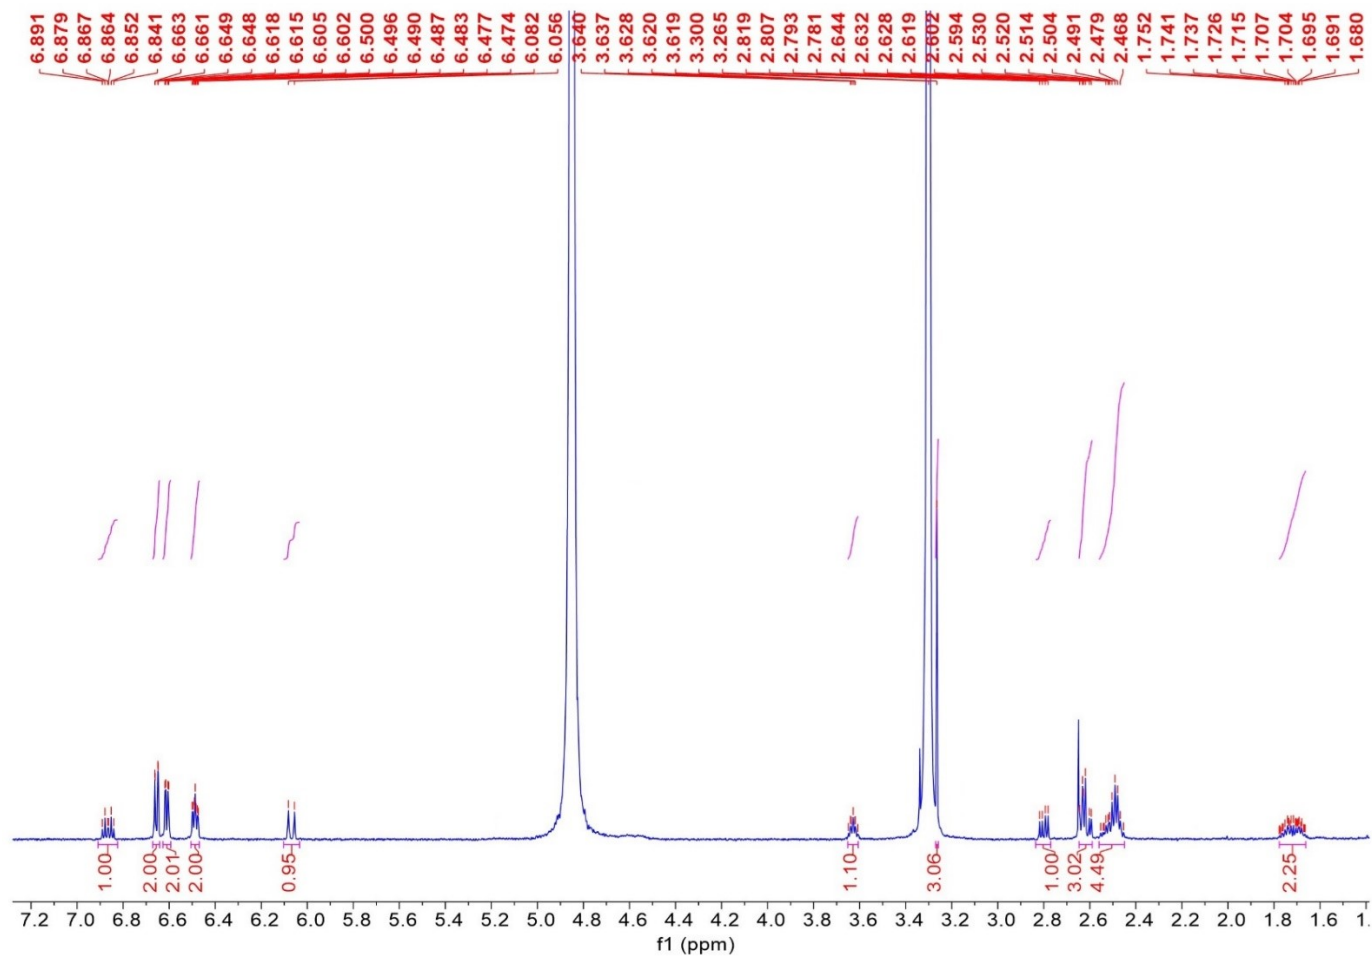

Figure S10. <sup>1</sup>H NMR Spectrum (600 MHz) of Peak Fr4-1 fraction (saximonsin A) in MeOH-*d*<sub>4</sub>

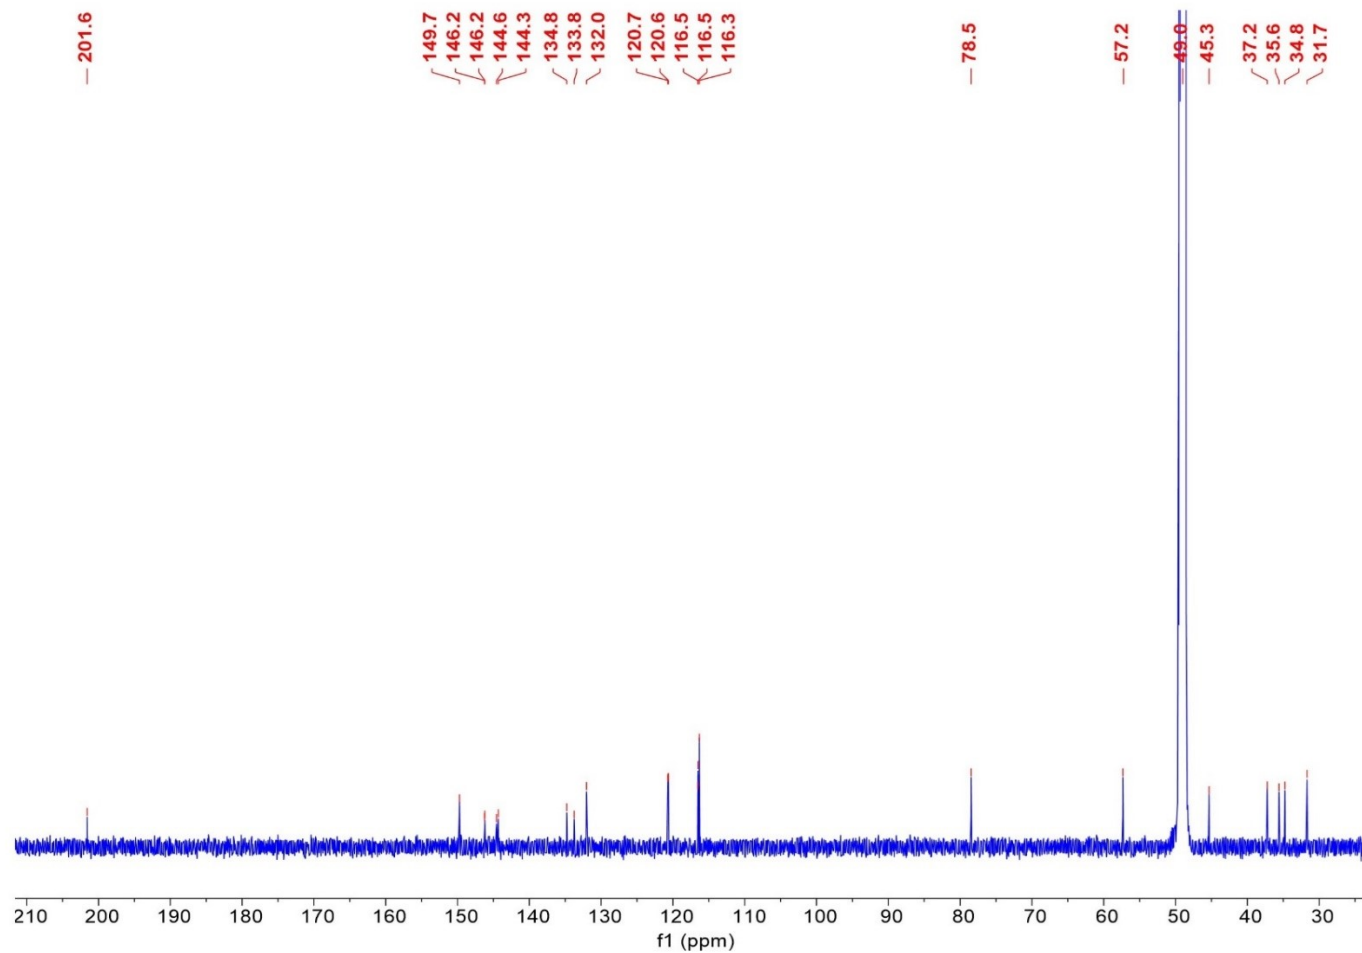

Figure S11.  $^{13}\text{C}$  NMR Spectrum (151 MHz) of Peak Fr4-1 fraction (saximonsin A) in  $\text{MeOH-}d_4$

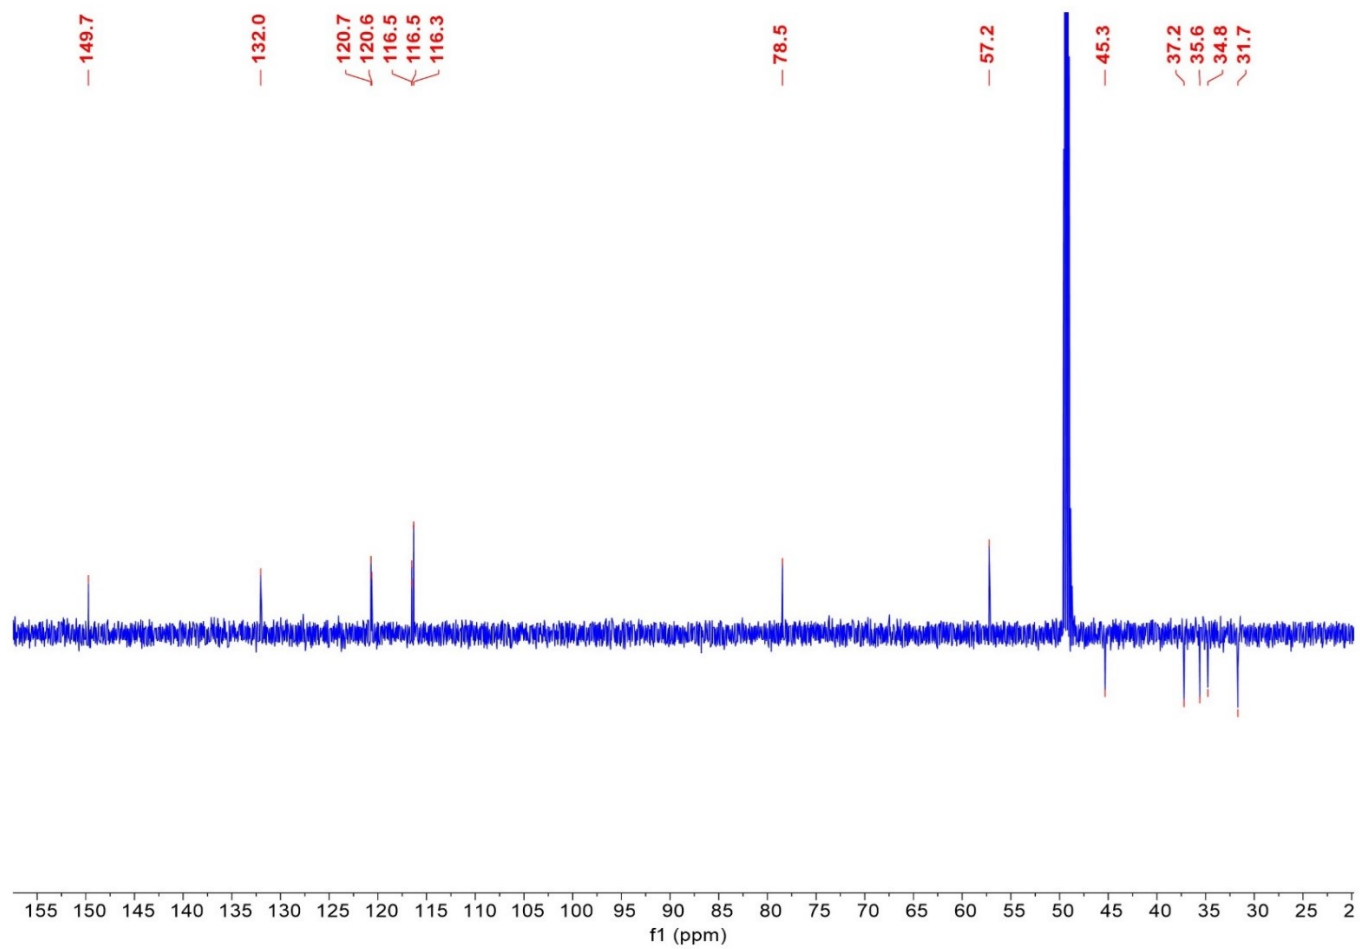

Figure S12. DEPT Spectrum of Peak Fr4-1 fraction (saximonsin A) in MeOH-*d*<sub>4</sub>

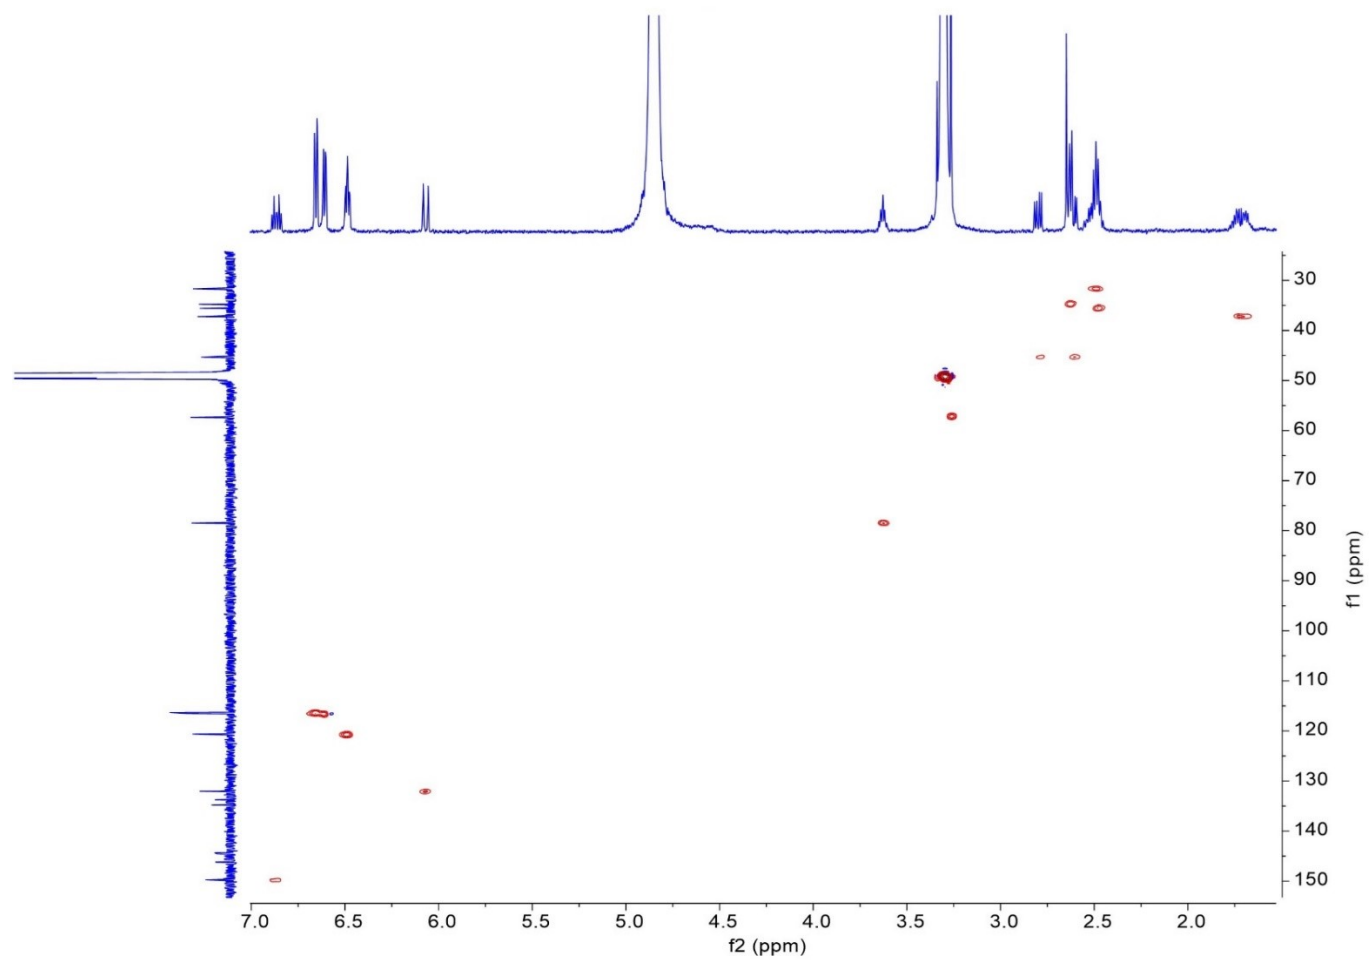

Figure S13. HSQC Spectrum of Peak Fr4-1 fraction (saximonsin A) in MeOH-*d*<sub>4</sub>

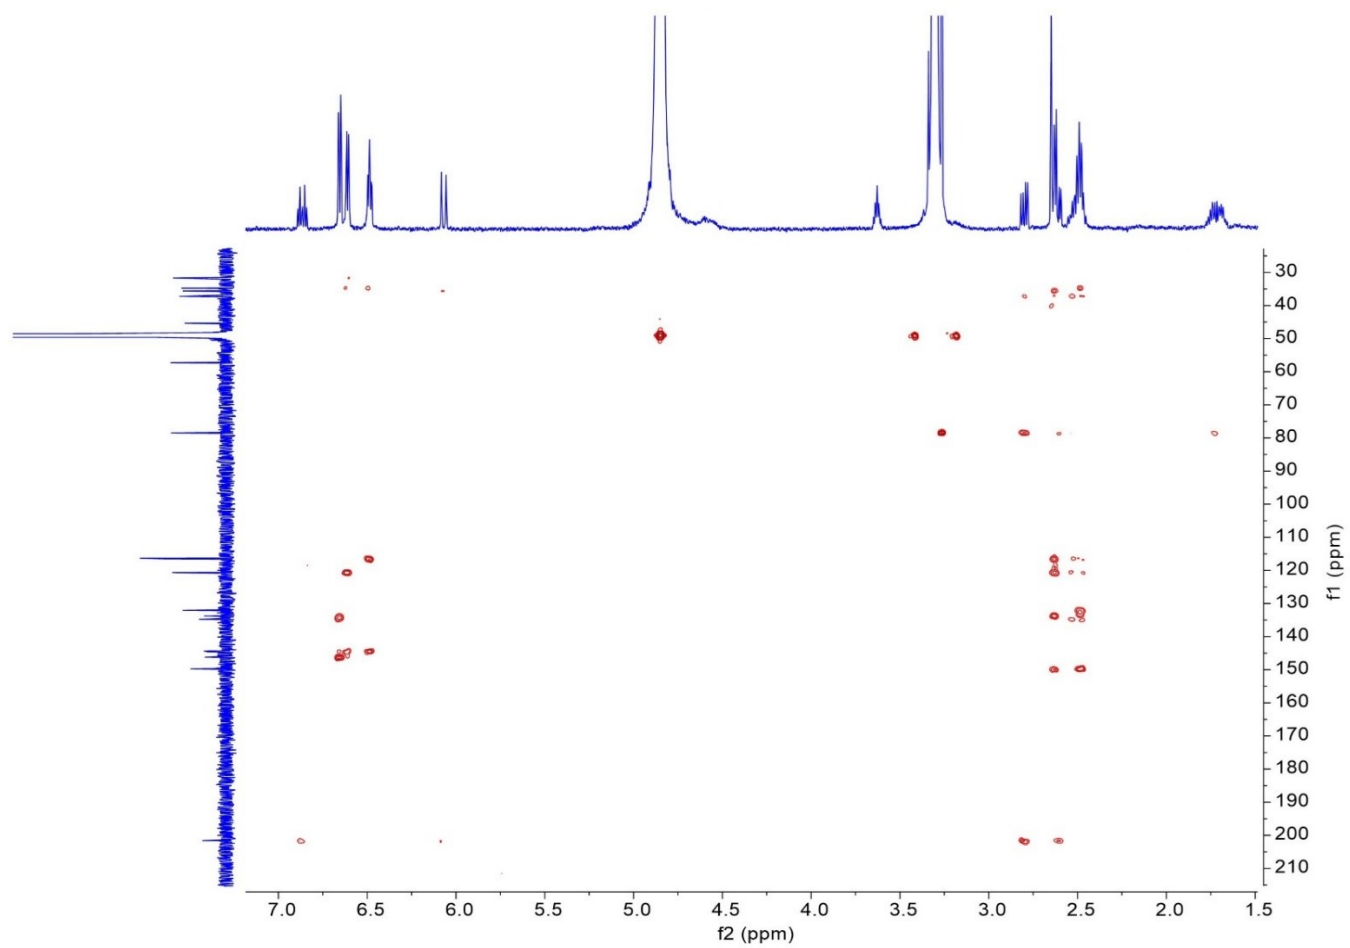

Figure S14. HMBC Spectrum of Peak Fr4-1 fraction (saximonsin A) in MeOH-*d*<sub>4</sub>



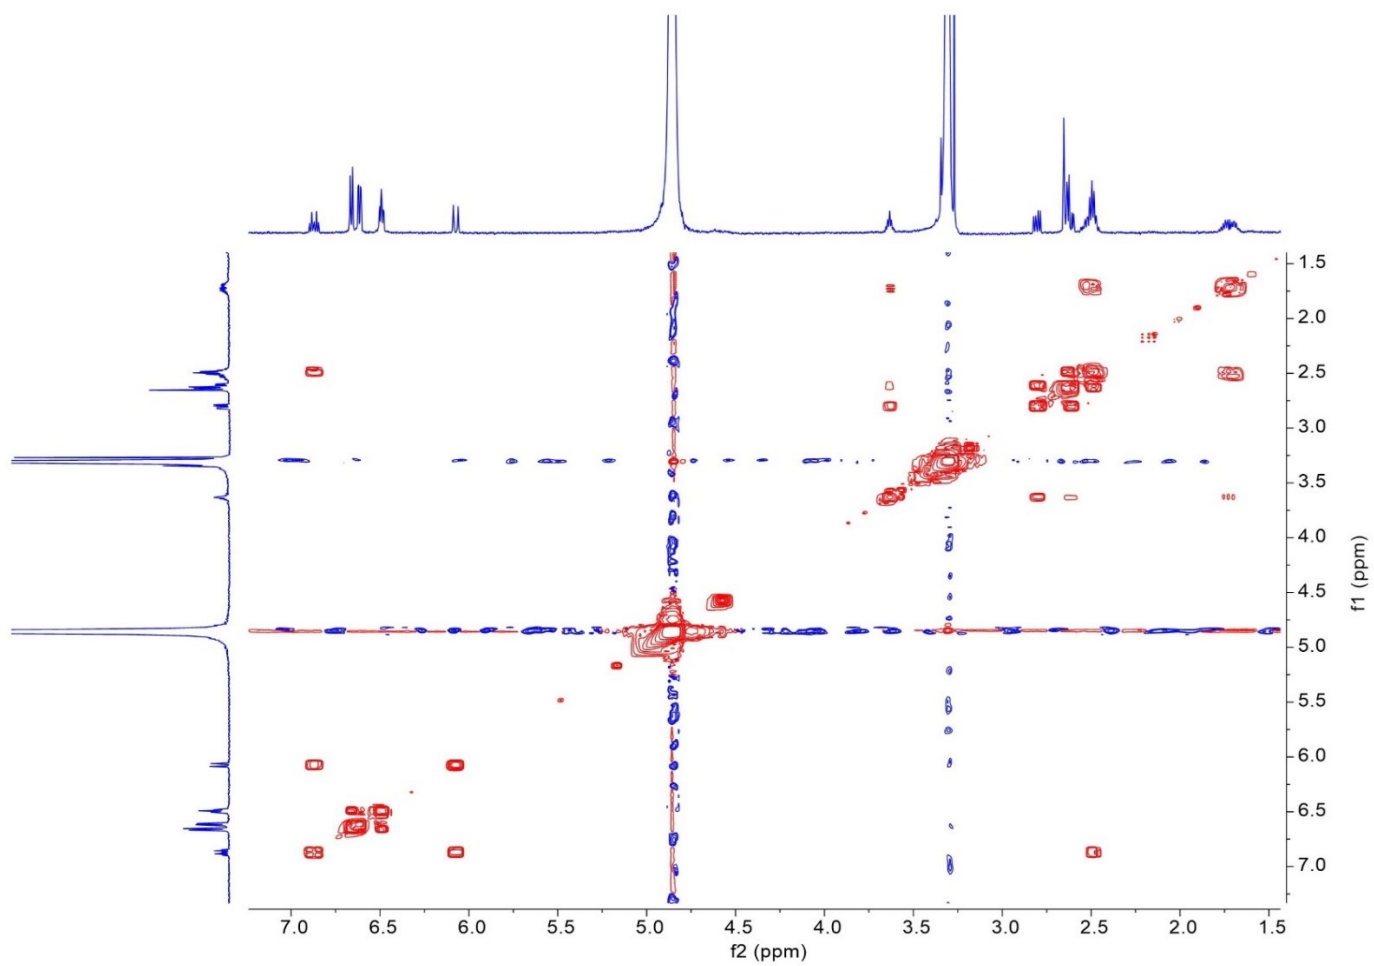

Figure S15. H-H COSY Spectrum of Peak Fr4-1 fraction (saximonsin A) in MeOH-*d*<sub>4</sub>

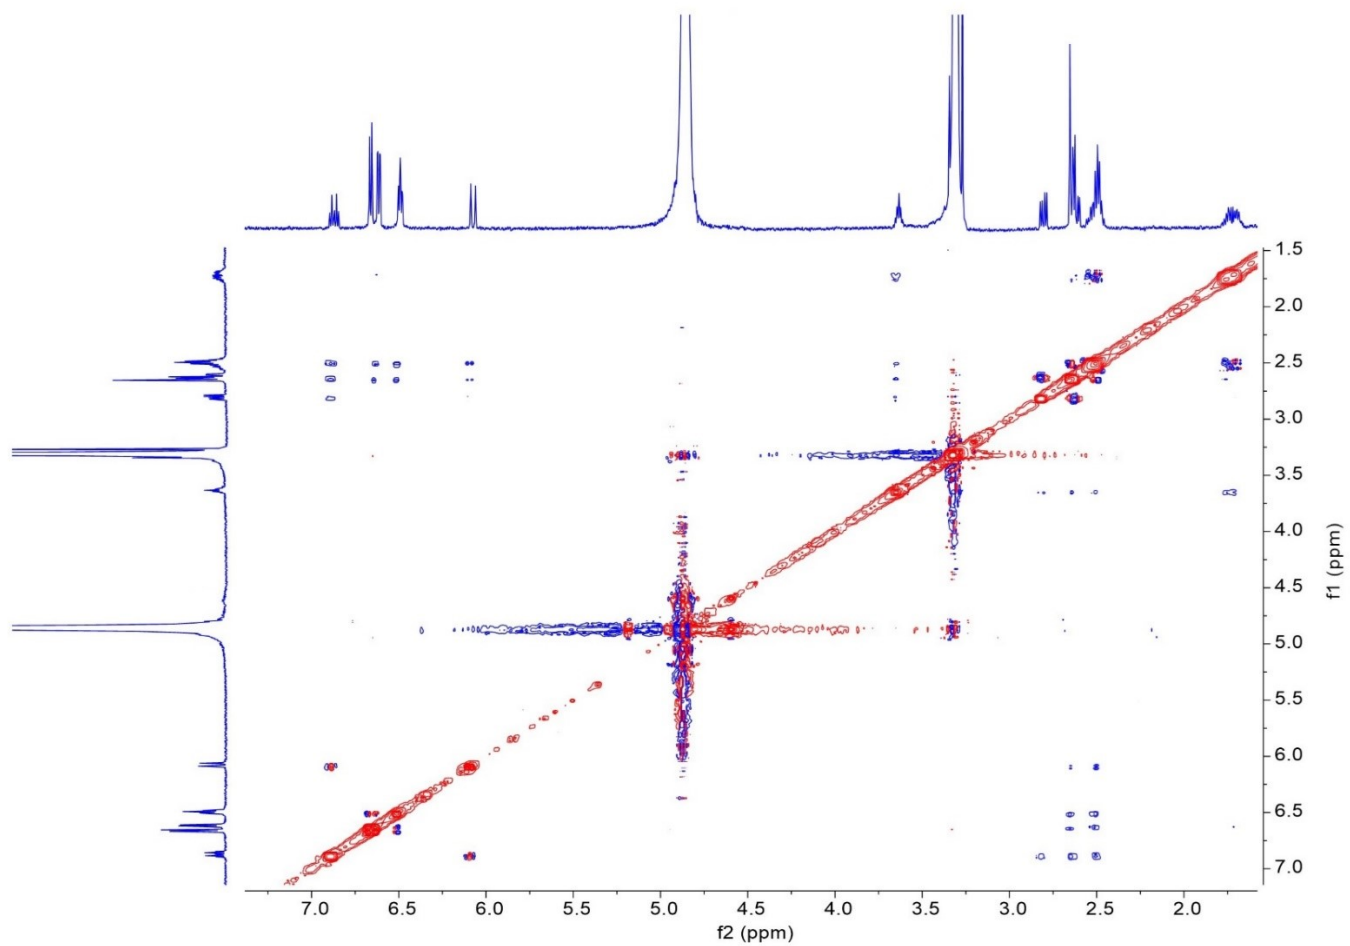

**Figure S16.** NOESY Spectrum of Peak Fr4-1 fraction (saximonsin A) in MeOH-*d*<sub>4</sub>

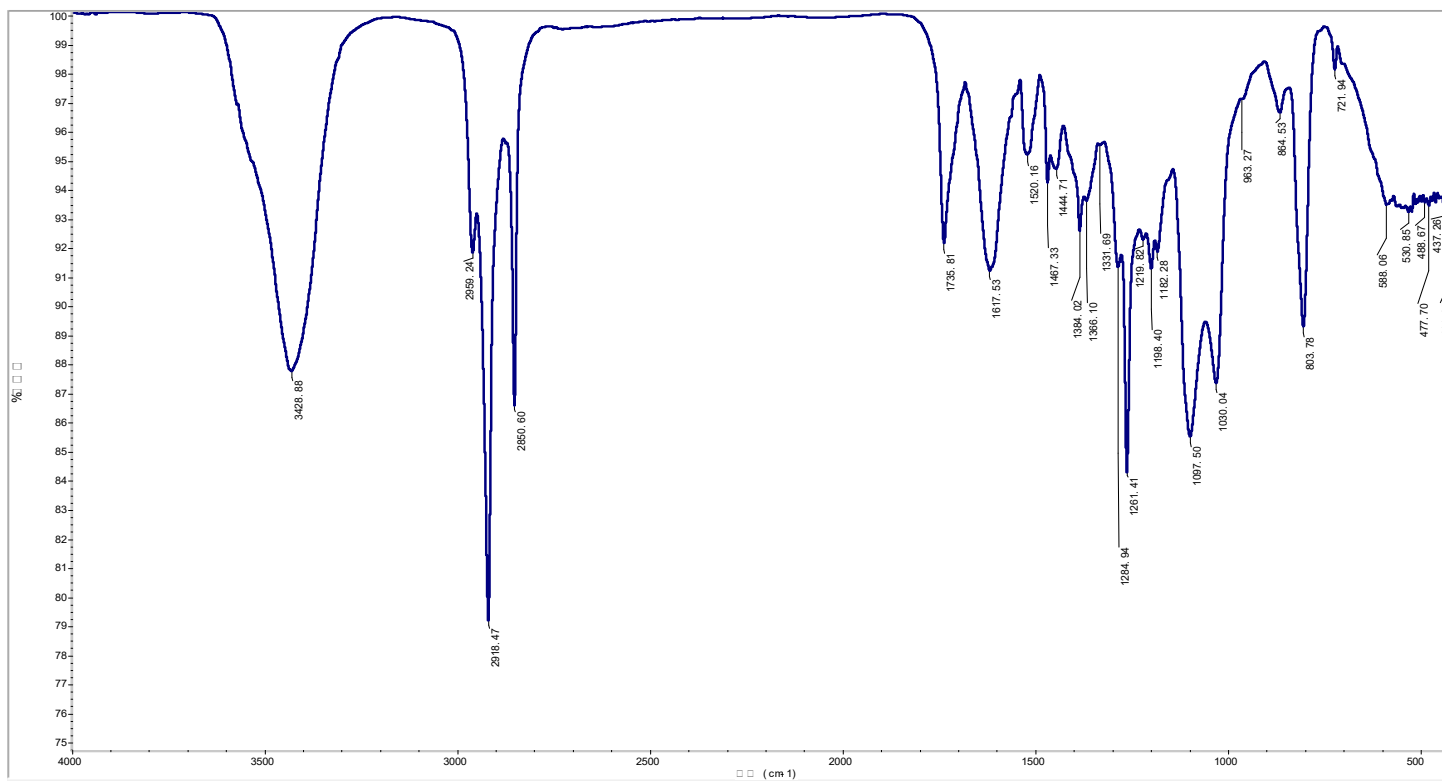

Sample Name: J DangJ - 1

KBr

: 9 16 09: 57: 09 2020 (GMT+08: 00)

NI COLET i S10

Software version: OMNIC 9. 8. 372

: 16

: 16

: 4. 000

: 1. 0

: 0. 4747

: 80. 00

**Figure S17. IR spectrum of Peak Fr4-1 fraction (saximonsin A)**

数据集: JDJ-1 - RawData

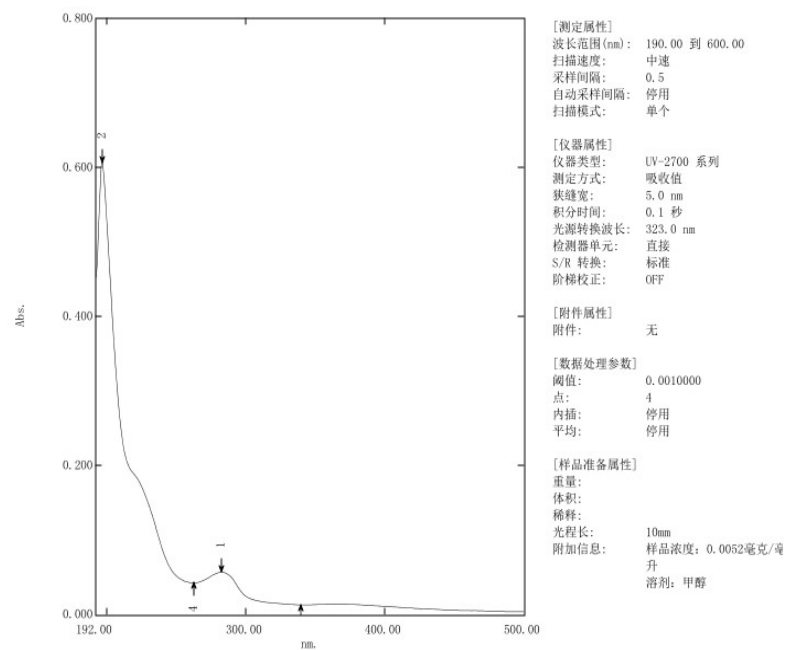

Figure S18. UV spectrum of Peak Fr4-1 fraction (saximonsin A)

### **Rudolph Research Analytical**

This sample was measured on an Autopol VI, Serial #91058  
Manufactured by Rudolph Research Analytical, Hackettstown, NJ, USA.

Measurement Date : Saturday, 05-SEP-2020

Set Temperature : OFF

Time Delay : Disabled

Delay between Measurement : Disabled

| <u>n</u>    | <u>Average</u>   | <u>Std.Dev.</u> | <u>% RSD</u>  | <u>Maximum</u> | <u>Minimum</u> |               |              |                     |              |
|-------------|------------------|-----------------|---------------|----------------|----------------|---------------|--------------|---------------------|--------------|
| 5           | 80.09            | 4.73            | 5.90          | 84.55          | 72.73          |               |              |                     |              |
| <u>S.No</u> | <u>Sample ID</u> | <u>Time</u>     | <u>Result</u> | <u>Scale</u>   | <u>OR °Arc</u> | <u>WLG.nm</u> | <u>Lq.mm</u> | <u>Conc.g/100ml</u> | <u>Temp.</u> |
| 1           | JDJ-1            | 10:57:00 AM     | 72.73         | SR             | 0.0160         | 589           | 100.00       | 0.022               | 25.2         |
| 2           | JDJ-1            | 10:57:08 AM     | 78.18         | SR             | 0.0172         | 589           | 100.00       | 0.022               | 25.2         |
| 3           | JDJ-1            | 10:57:17 AM     | 82.73         | SR             | 0.0182         | 589           | 100.00       | 0.022               | 25.2         |
| 4           | JDJ-1            | 10:57:25 AM     | 82.27         | SR             | 0.0181         | 589           | 100.00       | 0.022               | 25.3         |
| 5           | JDJ-1            | 10:57:33 AM     | 84.55         | SR             | 0.0186         | 589           | 100.00       | 0.022               | 25.3         |

**Figure S19. Optical rotation of Peak Fr4-1 fraction (saximonsin A)**

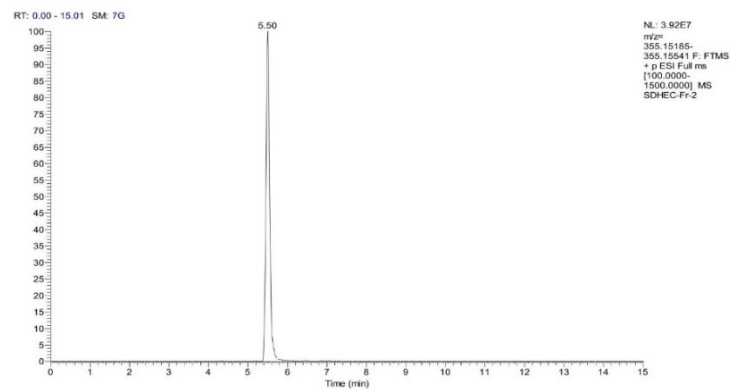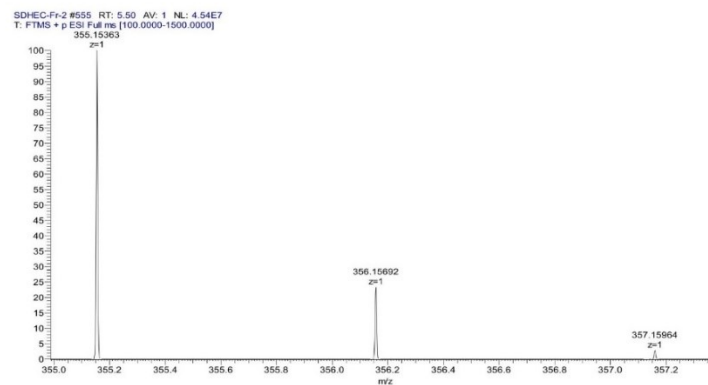

| m/z       | Theo. Mass | Delta (ppm) | RDB equiv. | Composition |     |
|-----------|------------|-------------|------------|-------------|-----|
| 355.15363 | 355.15400  | -1.04       | 10.5       | C21 H23 O5  | M+H |

**Figure S20. HR-ESI-MS of Peak Fr4-2 fraction (saximonsin B)**

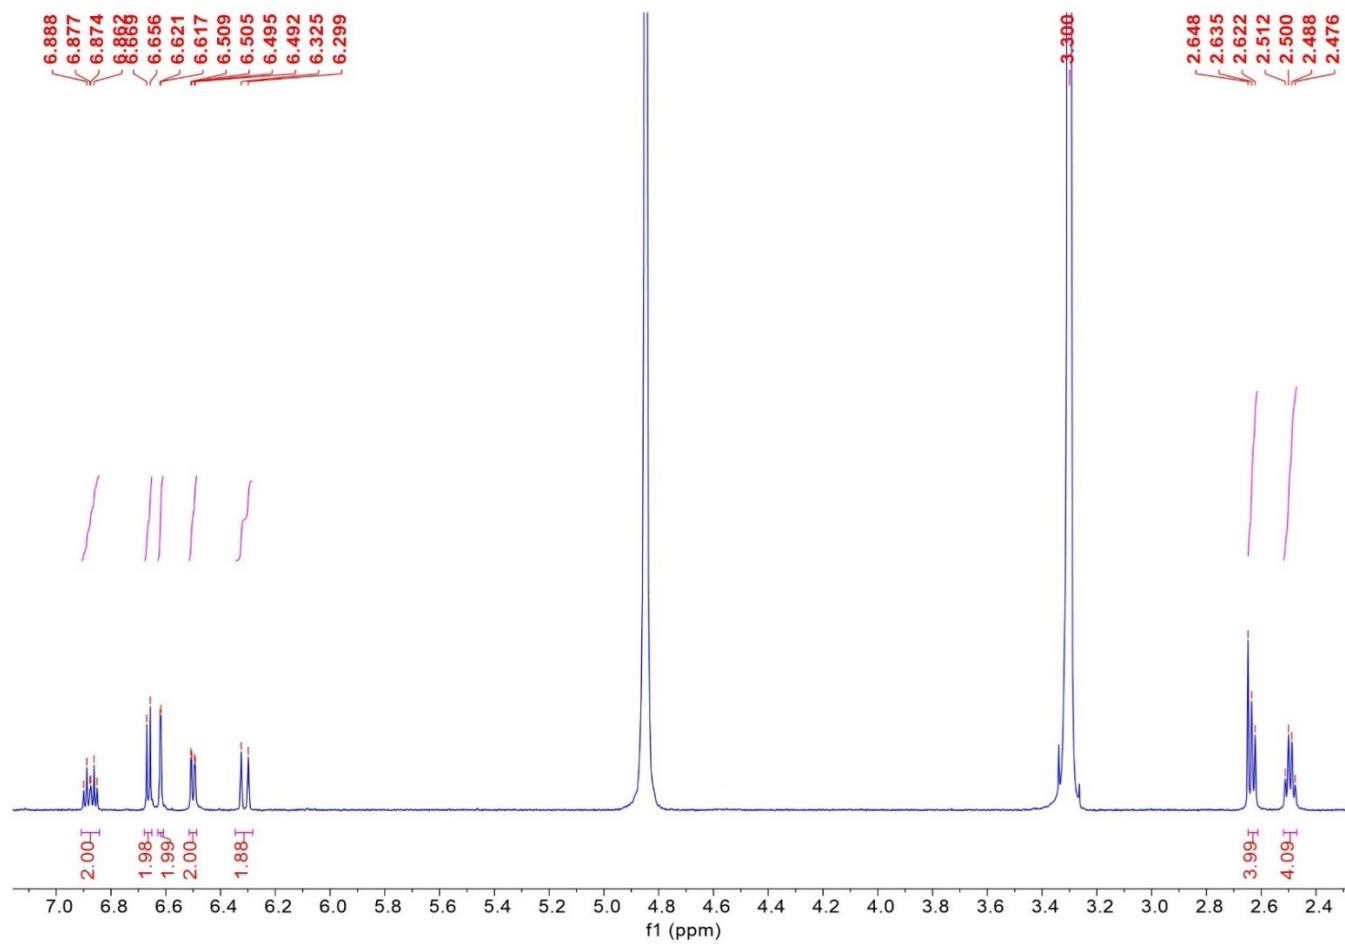

Figure S21. <sup>1</sup>H NMR Spectrum (600 MHz) of Peak Fr4-2 fraction (saximonsin B) in MeOH-*d*<sub>4</sub>

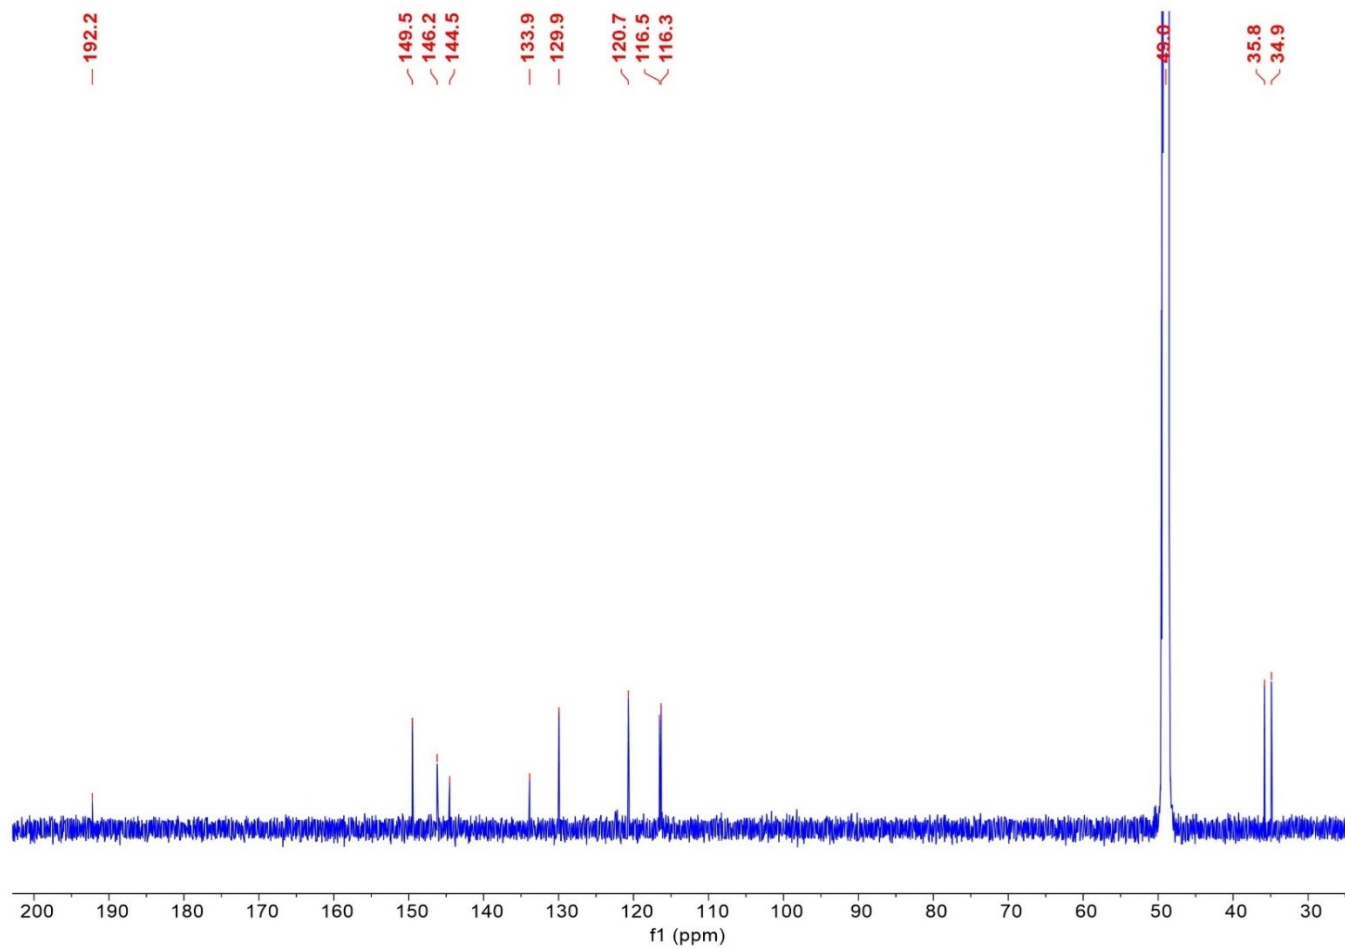

Figure S22.  $^{13}\text{C}$  NMR Spectrum (151 MHz) of Peak Fr4-2 fraction (saximonsin B) in  $\text{MeOH-}d_4$



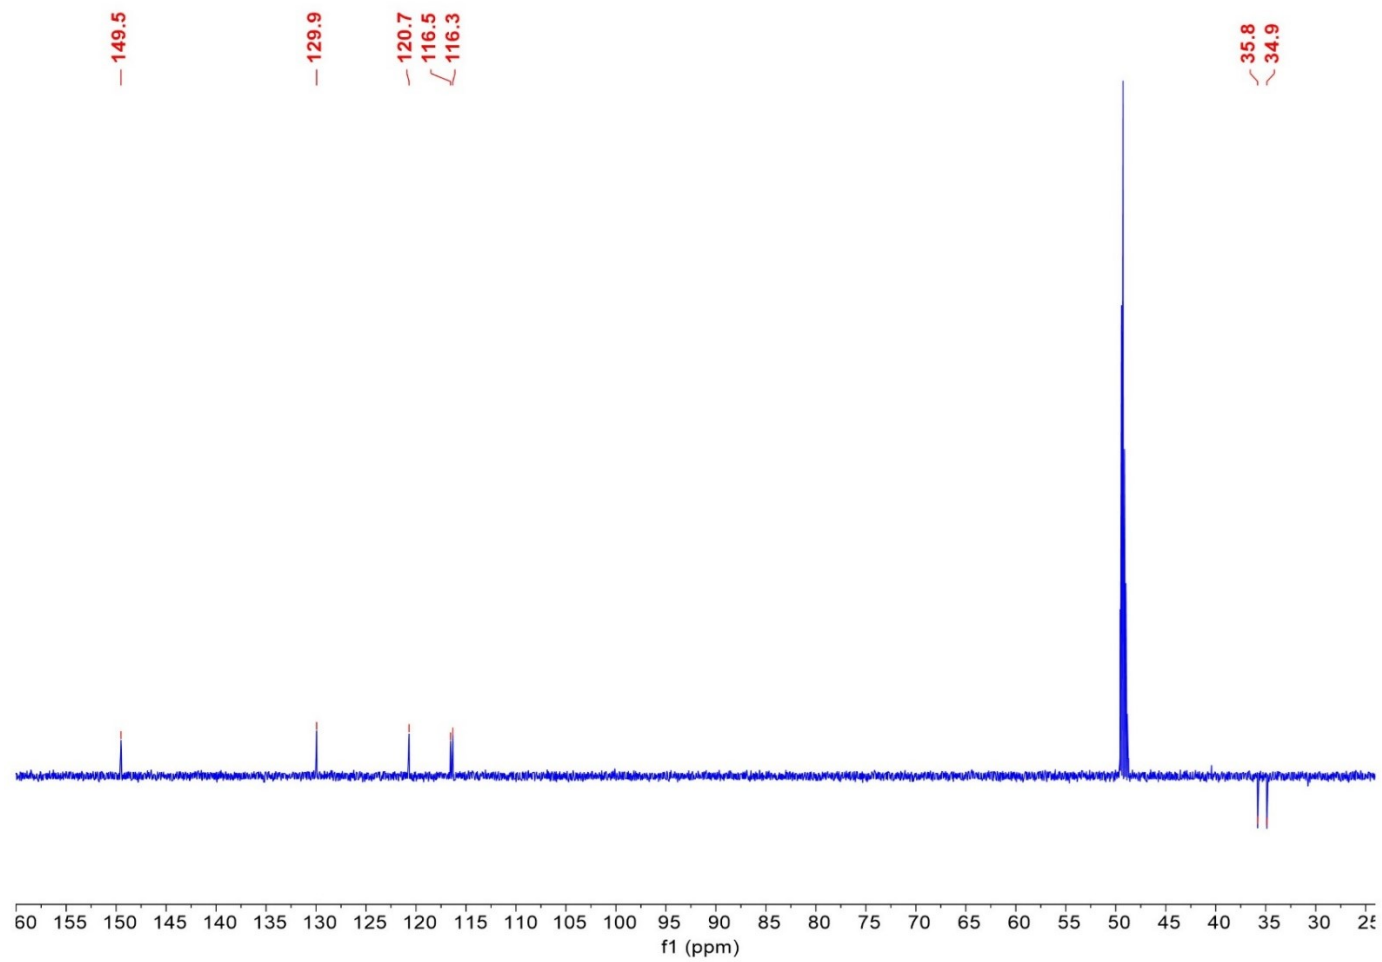

Figure S23. DEPT Spectrum of Peak Fr4-2 fraction (saximonsin B) in MeOH- $d_4$

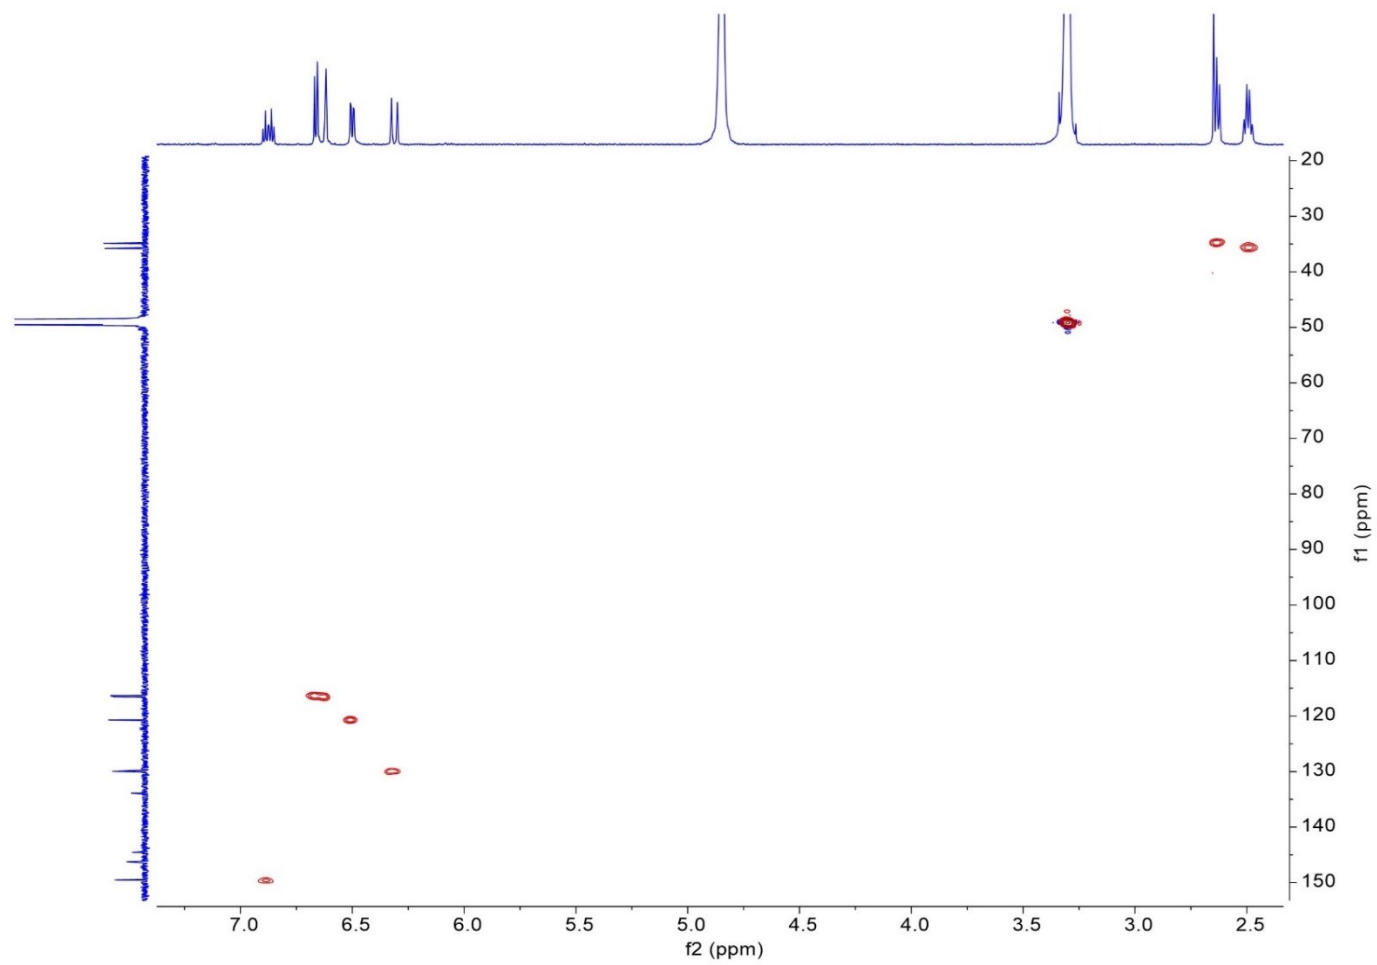

Figure S24. HSQC Spectrum of Peak Fr4-2 fraction (saximonsin B) in  $\text{MeOH-}d_4$

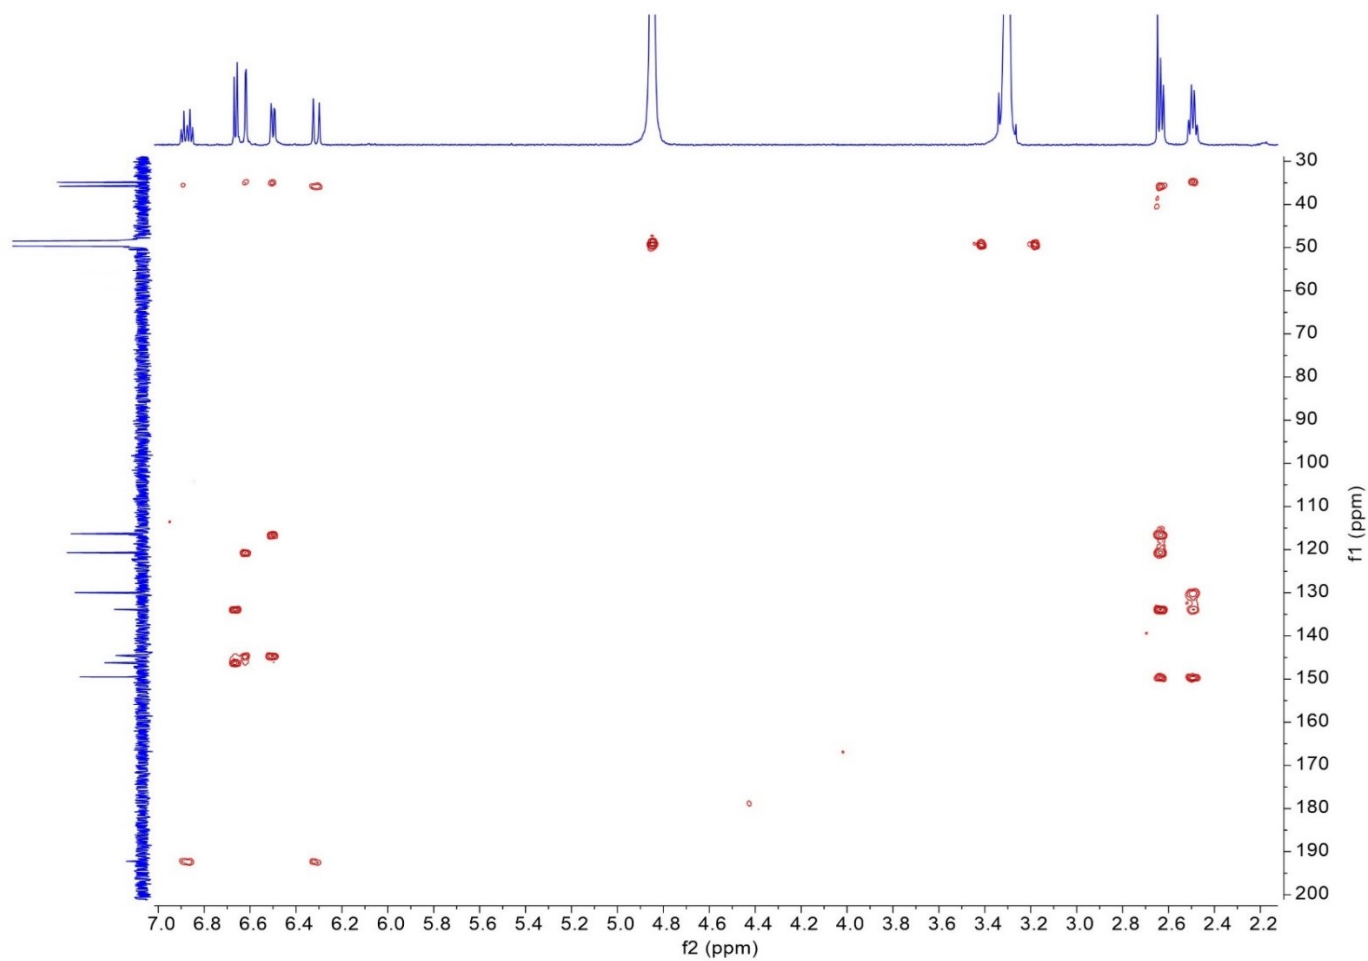

Figure S25. HMBC Spectrum of Peak Fr4-2 fraction (saximonsin B) in MeOH-*d*<sub>4</sub>

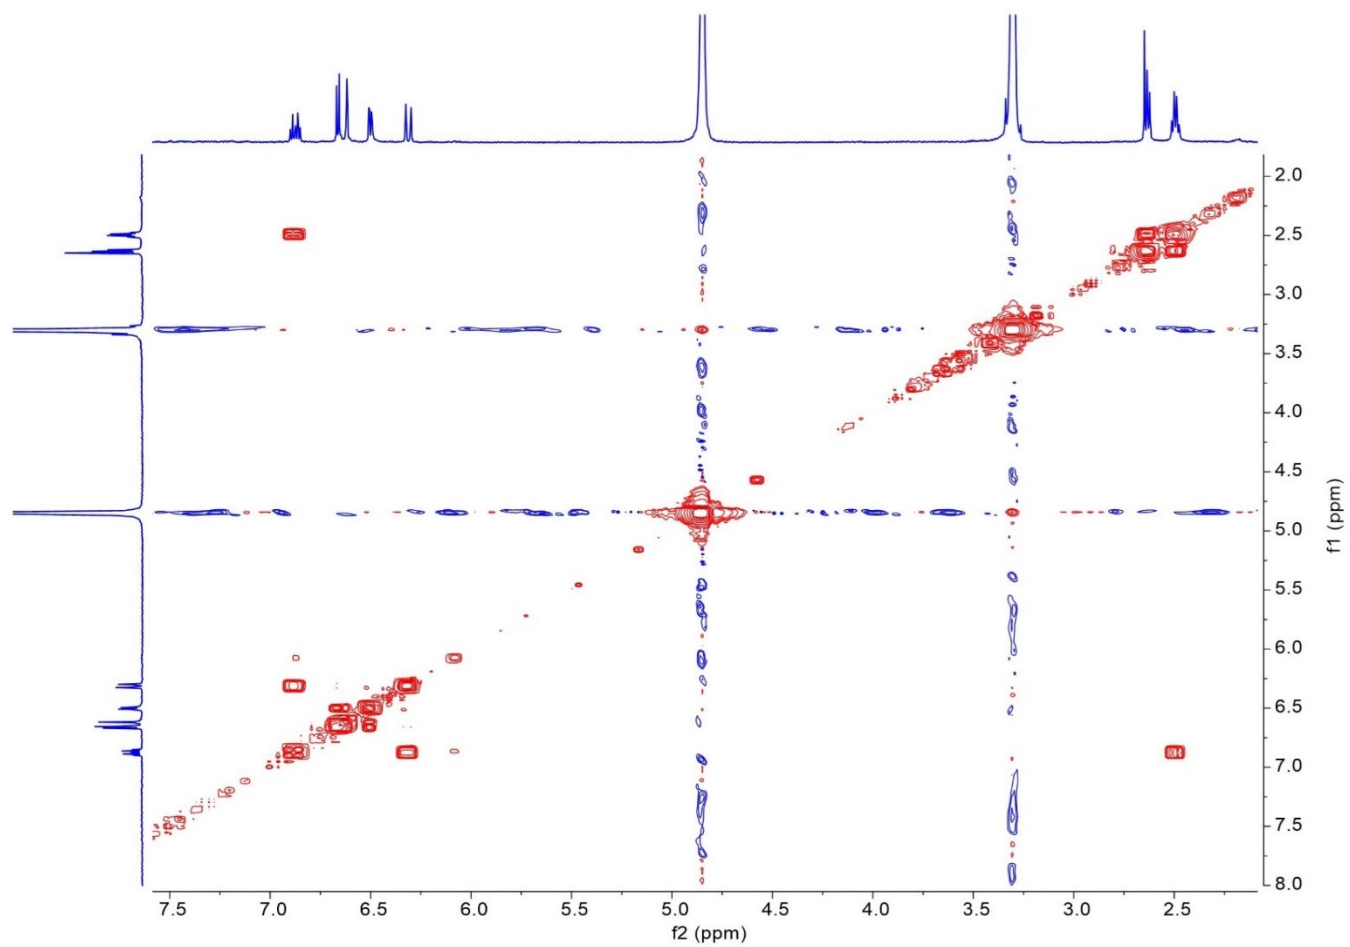

Figure S26. H-H COSY Spectrum of Peak Fr4-2 fraction (saximonsin B) in MeOH- $d_4$

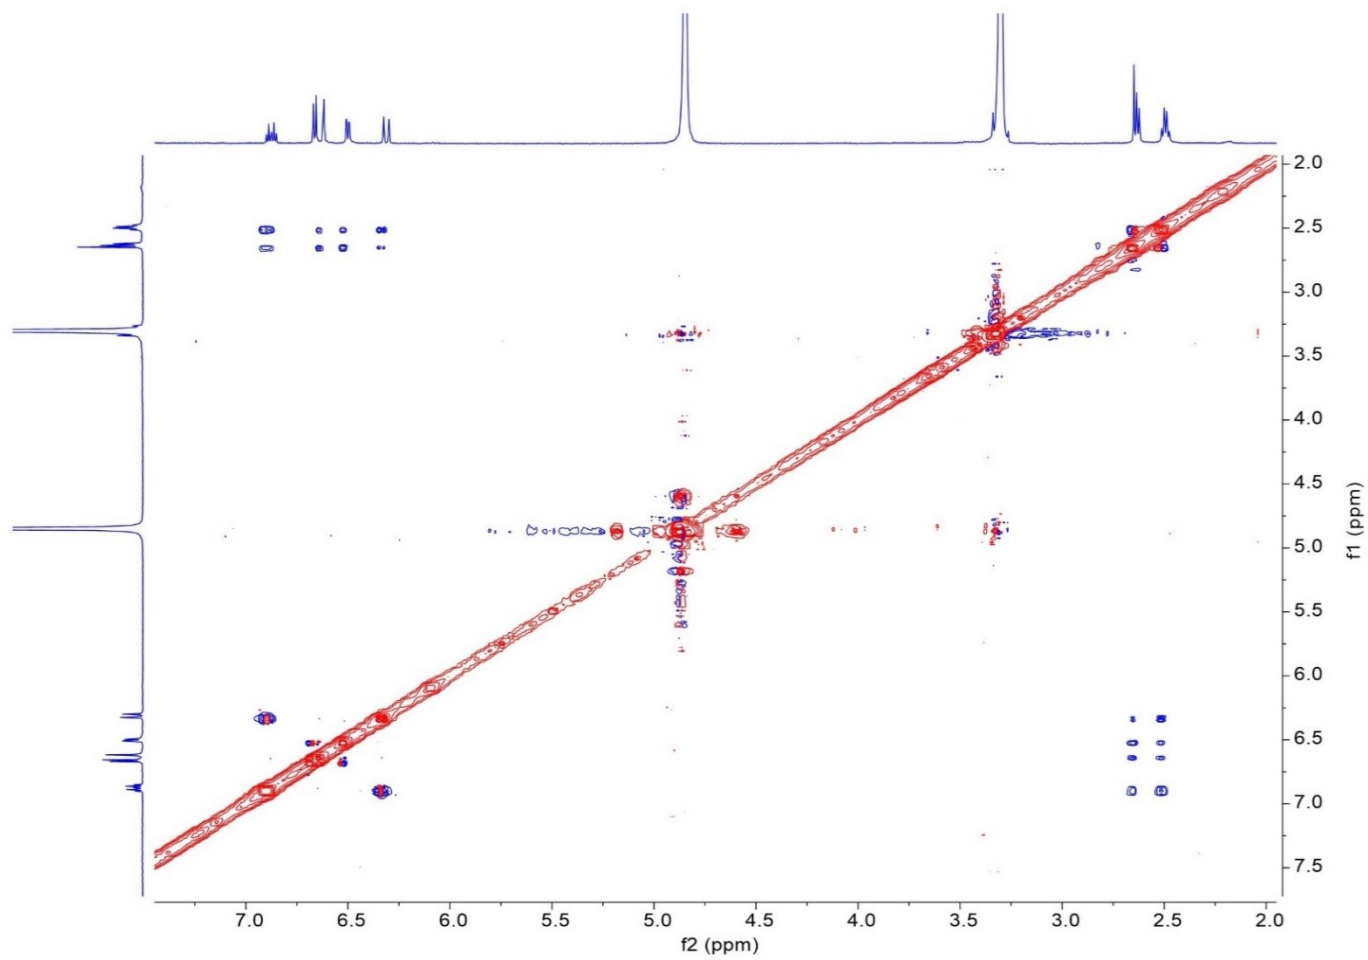

Figure S27. NOESY Spectrum of Peak Fr4-2 fraction (saximonsin B) in MeOH- $d_4$

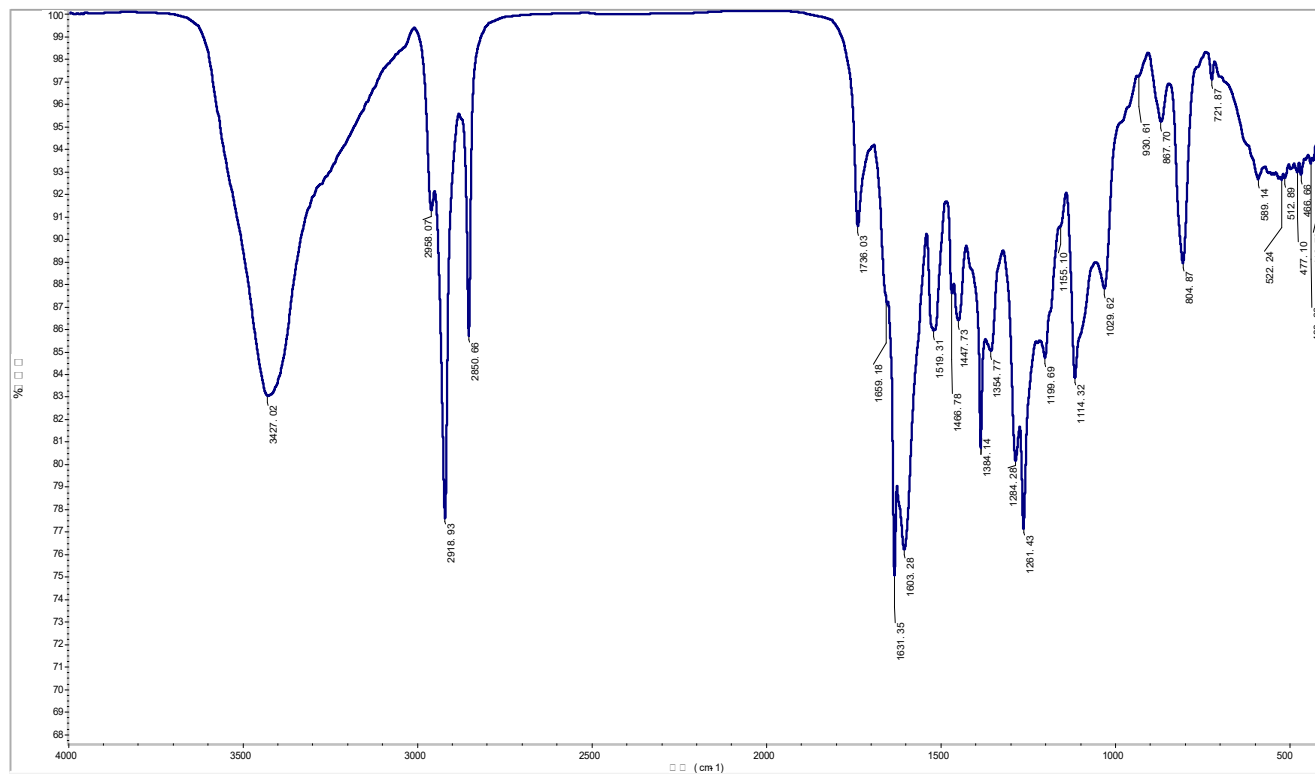

Sample Name: J Dangj - 2  
 KBr  
 16 10: 25: 09 2020 (GMT+08: 00)  
 NI COLET i S10  
 Software version: OMNIC 9. 8. 372

16  
 16  
 4.000  
 1.0  
 0.4747  
 80.00

**Figure S28. IR spectrum of Peak Fr4-2 fraction (saximonsin B)**

# 光谱峰值检测报告

2020/09/07 14:02:15

数据集: JDJ-2 - RawData

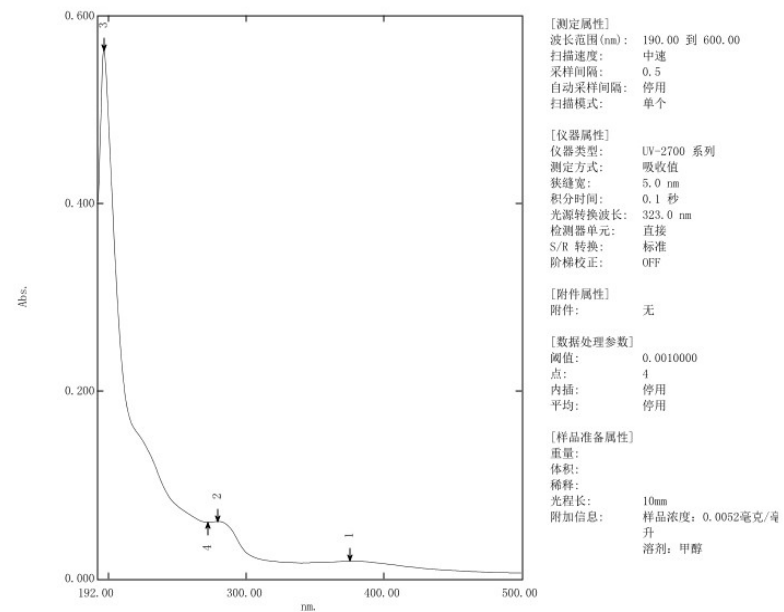

| No. | P/V | 波长 (nm) | Abs.  | 描述 |
|-----|-----|---------|-------|----|
| 1   | ①   | 375.00  | 0.019 |    |
| 2   | ②   | 279.50  | 0.061 |    |
| 3   | ③   | 196.50  | 0.563 |    |
| 4   | ④   | 272.50  | 0.060 |    |

Figure S29. UV spectrum of Peak Fr4-2 fraction (saximonsin B)
